# Supplementary material for: Quinoline-attached triazacyclononane (TACN) derivatives as fluorescent zinc sensors
Source: Royal Society of Chemistry journal article supplement (doi:10.1039/c3dt52107a), 2013-10-30
Supplement: c3dt52107a.pdf [file c3dt52107a.pdf]

Supplementary Information for  
**Quinoline-attached triazacyclononane(TACN) derivatives as fluorescent zinc  
sensors**

Yuji Mikata,<sup>a,b,\*</sup> Yuki Noudomi,<sup>b</sup> Asako Kizu<sup>b</sup> and Hideo Konno<sup>c</sup>

<sup>a</sup>*KYOUSEI Science Center and* <sup>b</sup>*Department of Chemistry, Faculty of Science, Nara  
Women's University, Nara 630-8506, Japan and* <sup>c</sup>*National Institute of Advanced Industrial  
Science and Technology (AIST), 1-1-1 Higashi, Tsukuba, Ibaraki 305-8565, Japan*

**Table S1.** Crystallographic Data for 6-MeOTQTACN (**5**), [Zn(6-MeOTQTACN)](ClO<sub>4</sub>)<sub>2</sub> (**5-Zn**) and [Cd(6-MeOTQTACN)](ClO<sub>4</sub>)<sub>2</sub> (**5-Cd**)

|                                                            | 6-MeOTQ-<br>TACN · CH <sub>3</sub> OH<br>( <b>1</b> · CH <sub>3</sub> OH) | [Zn(6-MeOTQ-<br>TACN)](ClO <sub>4</sub> ) <sub>2</sub><br>( <b>5-Zn</b> )         | [Cd(6-MeOTQ-<br>TACN)](ClO <sub>4</sub> ) <sub>2</sub><br>( <b>5-Cd</b> )        |
|------------------------------------------------------------|---------------------------------------------------------------------------|-----------------------------------------------------------------------------------|----------------------------------------------------------------------------------|
| Formula                                                    | C <sub>40</sub> H <sub>46</sub> N <sub>6</sub> O <sub>4</sub>             | C <sub>39</sub> H <sub>42</sub> Cl <sub>2</sub> N <sub>6</sub> O <sub>11</sub> Zn | C <sub>39</sub> H <sub>42</sub> CdCl <sub>2</sub> N <sub>6</sub> O <sub>11</sub> |
| FW                                                         | 674.84                                                                    | 907.08                                                                            | 954.11                                                                           |
| Crystal system                                             | triclinic                                                                 | monoclinic                                                                        | monoclinic                                                                       |
| Space group                                                | <i>P</i> -1                                                               | <i>P</i> 2 <sub>1</sub> / <i>c</i>                                                | <i>P</i> 2 <sub>1</sub> / <i>c</i>                                               |
| <i>a</i> , Å                                               | 10.257(2)                                                                 | 9.7431(4)                                                                         | 21.944(6)                                                                        |
| <i>b</i> , Å                                               | 13.830(3)                                                                 | 37.9514(11)                                                                       | 9.938(3)                                                                         |
| <i>c</i> , Å                                               | 13.985(3)                                                                 | 11.4609(4)                                                                        | 18.534(5)                                                                        |
| <i>α</i> , deg                                             | 68.153(7)                                                                 | 90                                                                                | 90                                                                               |
| <i>β</i> , deg                                             | 71.191(7)                                                                 | 112.976(2)                                                                        | 107.020(3)                                                                       |
| <i>γ</i> , deg                                             | 80.492(9)                                                                 | 90                                                                                | 90                                                                               |
| <i>V</i> , Å <sup>3</sup>                                  | 1740.8(6)                                                                 | 3901.6(3)                                                                         | 3865(2)                                                                          |
| <i>Z</i>                                                   | 2                                                                         | 4                                                                                 | 4                                                                                |
| <i>D</i> <sub>calc</sub> , g cm <sup>-3</sup>              | 1.287                                                                     | 1.544                                                                             | 1.640                                                                            |
| <i>μ</i> , mm <sup>-1</sup>                                | 0.0845                                                                    | 0.8371                                                                            | 0.7753                                                                           |
| 2θ <sub>max</sub> , deg                                    | 55                                                                        | 55                                                                                | 55                                                                               |
| temp, K                                                    | 123                                                                       | 123                                                                               | 123                                                                              |
| no. reflns collected                                       | 13703                                                                     | 33276                                                                             | 29253                                                                            |
| no. reflns used                                            | 7595                                                                      | 8893                                                                              | 8768                                                                             |
| no. of params                                              | 619                                                                       | 727                                                                               | 700                                                                              |
| <i>R</i> <sub>int</sub>                                    | 0.0215                                                                    | 0.0240                                                                            | 0.0425                                                                           |
| Final <i>R</i> 1 ( <i>I</i> > 2σ( <i>I</i> )) <sup>a</sup> | 0.0744                                                                    | 0.0391                                                                            | 0.0563                                                                           |
| <i>wR</i> 2 (all data) <sup>b</sup>                        | 0.2269                                                                    | 0.0953                                                                            | 0.1595                                                                           |
| GOF                                                        | 1.055                                                                     | 1.069                                                                             | 1.168                                                                            |

---

$${}^aR1 = \Sigma||F_o| - |F_c||/\Sigma|F_o|. \quad {}^b_wR2 = [\Sigma w[(F_o^2 - F_c^2)^2]/\Sigma[w(F_o^2)^2]]^{1/2}.$$

**Table S2.** Crystallographic Data for [Zn(1-isoTQTACN)](ClO<sub>4</sub>)<sub>2</sub> · CH<sub>3</sub>OH (**6-Zn** · CH<sub>3</sub>OH) and [Cd(1-isoTQTACN)](ClO<sub>4</sub>)<sub>2</sub> · 0.5CH<sub>3</sub>OH (**6-Cd** · 0.5CH<sub>3</sub>OH)

|                                                            | [Zn(1-isoTQTACN)]-<br>(ClO <sub>4</sub> ) <sub>2</sub> · CH <sub>3</sub> OH<br>( <b>6-Zn</b> · CH <sub>3</sub> OH) | [Cd(1-isoTQTACN)]-<br>(ClO <sub>4</sub> ) <sub>2</sub> · 0.5CH <sub>3</sub> OH<br>( <b>6-Cd</b> · 0.5CH <sub>3</sub> OH) |
|------------------------------------------------------------|--------------------------------------------------------------------------------------------------------------------|--------------------------------------------------------------------------------------------------------------------------|
| Formula                                                    | C <sub>37</sub> H <sub>40</sub> Cl <sub>2</sub> N <sub>6</sub> O <sub>9</sub> Zn                                   | C <sub>36.5</sub> H <sub>38</sub> CdCl <sub>2</sub> N <sub>6</sub> O <sub>8.5</sub>                                      |
| FW                                                         | 849.04                                                                                                             | 880.05                                                                                                                   |
| Crystal system                                             | orthorhombic                                                                                                       | triclinic                                                                                                                |
| Space group                                                | <i>Pbca</i>                                                                                                        | <i>P</i> -1                                                                                                              |
| <i>a</i> , Å                                               | 7.721(3)                                                                                                           | 11.370(2)                                                                                                                |
| <i>b</i> , Å                                               | 19.269(3)                                                                                                          | 16.276(3)                                                                                                                |
| <i>c</i> , Å                                               | 21.462(3)                                                                                                          | 22.279(3)                                                                                                                |
| <i>α</i> , deg                                             | 90                                                                                                                 | 69.744(3)                                                                                                                |
| <i>β</i> , deg                                             | 90                                                                                                                 | 75.434(3)                                                                                                                |
| <i>γ</i> , deg                                             | 90                                                                                                                 | 88.391(5)                                                                                                                |
| <i>V</i> , Å <sup>3</sup>                                  | 7328(2)                                                                                                            | 3735.6(9)                                                                                                                |
| <i>Z</i>                                                   | 8                                                                                                                  | 4                                                                                                                        |
| <i>D</i> <sub>calc</sub> , g cm <sup>-3</sup>              | 1.539                                                                                                              | 1.565                                                                                                                    |
| <i>μ</i> , mm <sup>-1</sup>                                | 0.8816                                                                                                             | 0.7901                                                                                                                   |
| 2θ <sub>max</sub> , deg                                    | 55                                                                                                                 | 55                                                                                                                       |
| temp, K                                                    | 123                                                                                                                | 173                                                                                                                      |
| no. reflns collected                                       | 54863                                                                                                              | 37386                                                                                                                    |
| no. reflns used                                            | 8393                                                                                                               | 16828                                                                                                                    |
| no. of params                                              | 649                                                                                                                | 1027                                                                                                                     |
| <i>R</i> <sub>int</sub>                                    | 0.0456                                                                                                             | 0.0227                                                                                                                   |
| Final <i>R</i> 1 ( <i>I</i> > 2σ( <i>I</i> )) <sup>a</sup> | 0.0596                                                                                                             | 0.0517                                                                                                                   |
| <i>wR</i> 2 (all data) <sup>b</sup>                        | 0.1410                                                                                                             | 0.1517                                                                                                                   |
| GOF                                                        | 1.169                                                                                                              | 1.075                                                                                                                    |

---

$${}^aR1 = \Sigma||F_o| - |F_c||/\Sigma|F_o|. \quad {}^b_wR2 = [\Sigma w[(F_o^2 - F_c^2)^2]/\Sigma[w(F_o^2)^2]]^{1/2}.$$

**Table S3.** Crystallographic Data for [Cd(6-MeOTQEN)](ClO<sub>4</sub>)<sub>2</sub> · 2CH<sub>3</sub>OH (**2-Cd** · 2CH<sub>3</sub>OH)

| [Cd(6-MeOTQEN)](ClO <sub>4</sub> ) <sub>2</sub> · 2CH <sub>3</sub> OH ( <b>2-Cd</b> · 2CH <sub>3</sub> OH) |                                                                                  |
|------------------------------------------------------------------------------------------------------------|----------------------------------------------------------------------------------|
| Formula                                                                                                    | C <sub>48</sub> H <sub>52</sub> CdCl <sub>2</sub> N <sub>6</sub> O <sub>14</sub> |
| FW                                                                                                         | 1120.29                                                                          |
| Crystal system                                                                                             | orthorhombic                                                                     |
| Space group                                                                                                | <i>P</i> -1                                                                      |
| <i>a</i> , Å                                                                                               | 11.006(2)                                                                        |
| <i>b</i> , Å                                                                                               | 11.191(2)                                                                        |
| <i>c</i> , Å                                                                                               | 20.600(4)                                                                        |
| $\alpha$ , deg                                                                                             | 78.273(5)                                                                        |
| $\beta$ , deg                                                                                              | 79.581(5)                                                                        |
| $\gamma$ , deg                                                                                             | 74.864(5)                                                                        |
| <i>V</i> , Å <sup>3</sup>                                                                                  | 2376.2(7)                                                                        |
| <i>Z</i>                                                                                                   | 2                                                                                |
| <i>D</i> <sub>calc</sub> , g cm <sup>-3</sup>                                                              | 1.566                                                                            |
| $\mu$ , mm <sup>-1</sup>                                                                                   | 0.6479                                                                           |
| 2 $\theta$ <sub>max</sub> , deg                                                                            | 55                                                                               |
| temp, K                                                                                                    | 153                                                                              |
| no. reflns collected                                                                                       | 23551                                                                            |
| no. reflns used                                                                                            | 10707                                                                            |
| no. of params                                                                                              | 828                                                                              |
| <i>R</i> <sub>int</sub>                                                                                    | 0.0176                                                                           |
| Final <i>R</i> 1 ( <i>I</i> > 2 $\sigma$ ( <i>I</i> )) <sup>a</sup>                                        | 0.0408                                                                           |
| <i>wR</i> 2 (all data) <sup>b</sup>                                                                        | 0.1137                                                                           |
| GOF                                                                                                        | 1.063                                                                            |

<sup>a</sup>*R*1 =  $\Sigma||F_o| - |F_c||/\Sigma|F_o|$ . <sup>b</sup>*wR*2 =  $[\Sigma w[(F_o^2 - F_c^2)^2]/\Sigma[w(F_o^2)^2]]^{1/2}$ .

**Table S4.** Selected Bond Distances for Zinc and Cadmium Complexes with 6-MeOTQTACN (**5**) and 1-isoTQTACN (**6**) in the Crystal Structure

|                               | [Zn(6-MeO-TQTACN)]-(ClO <sub>4</sub> ) <sub>2</sub> ( <b>5-Zn</b> ) | [Cd(6-MeO-TQTACN)]-(ClO <sub>4</sub> ) <sub>2</sub> ( <b>5-Cd</b> ) | [Zn(1-isoTQTACN)](ClO <sub>4</sub> ) <sub>2</sub> ·CH <sub>3</sub> OH ( <b>6-Zn</b> ·CH <sub>3</sub> OH) | [Cd(1-isoTQTACN)](ClO <sub>4</sub> ) <sub>2</sub> ·0.5CH <sub>3</sub> OH ( <b>6-Cd</b> ·0.5CH <sub>3</sub> OH) |
|-------------------------------|---------------------------------------------------------------------|---------------------------------------------------------------------|----------------------------------------------------------------------------------------------------------|----------------------------------------------------------------------------------------------------------------|
| M-N1 <sup>a</sup>             | 2.2227(19)                                                          | 2.417(4)                                                            | 2.205(3)                                                                                                 | 2.359(4), 2.402(4)                                                                                             |
| M-N2 <sup>a</sup>             | 2.2260(17)                                                          | 2.370(4)                                                            | 2.212(3)                                                                                                 | 2.366(4), 2.379(4)                                                                                             |
| M-N3 <sup>a</sup>             | 2.1853(15)                                                          | 2.387(4)                                                            | 2.175(3)                                                                                                 | 2.392(3), 2.354(4)                                                                                             |
| Mean M-N <sub>aliphatic</sub> | 2.211                                                               | 2.391(0.180) <sup>c</sup>                                           | 2.197                                                                                                    | 2.375(0.178) <sup>c</sup>                                                                                      |
| M-N4 <sup>b</sup>             |                                                                     | 2.2085(13)                                                          | 2.307(4)                                                                                                 | 2.146(3) 2.284(3),<br>2.275(3)                                                                                 |
| M-N5 <sup>b</sup>             |                                                                     | 2.196(2)                                                            | 2.335(4)                                                                                                 | 2.120(3) 2.290(3),<br>2.288(4)                                                                                 |
| M-N6 <sup>b</sup>             |                                                                     | 2.2357(17)                                                          | 2.342(5)                                                                                                 | 2.163(3) 2.316(4),<br>2.305(4)                                                                                 |
| Mean M-N <sub>aromatic</sub>  | 2.213                                                               | 2.328(0.115) <sup>c</sup>                                           | 2.143                                                                                                    | 2.293(0.150) <sup>c</sup>                                                                                      |

<sup>a</sup> Aliphatic nitrogen atoms.

<sup>b</sup> Aromatic nitrogen atoms.

<sup>c</sup> Values in parentheses indicate the difference between zinc and cadmium complexes.

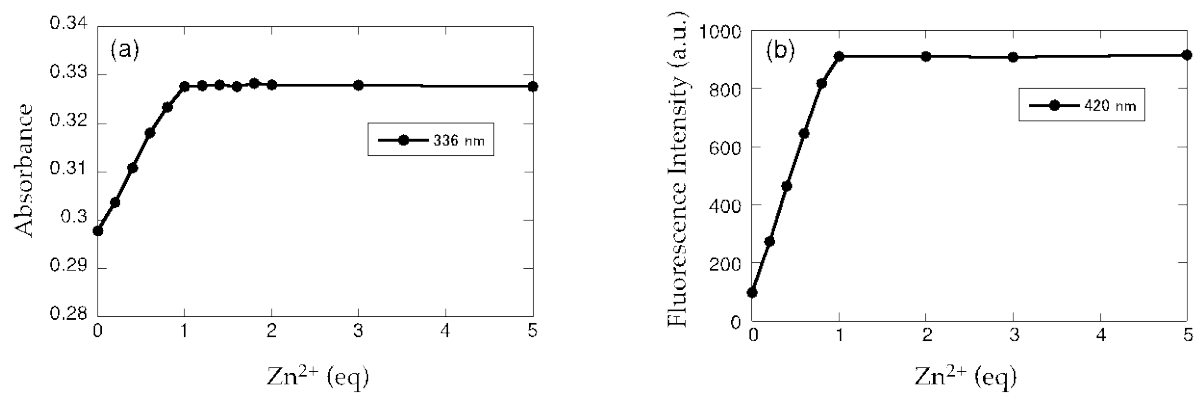

**Figure S1.** Zinc titration profile for 34 μM 6-MeOTQTACN (**5**) in DMF/H<sub>2</sub>O (1:1) at 25 °C. (a) UV-vis absorbance changes at 322 and 334 nm. (b) Fluorescence intensity changes ( $\lambda_{\text{ex}} = 341$  nm) at 420 nm.



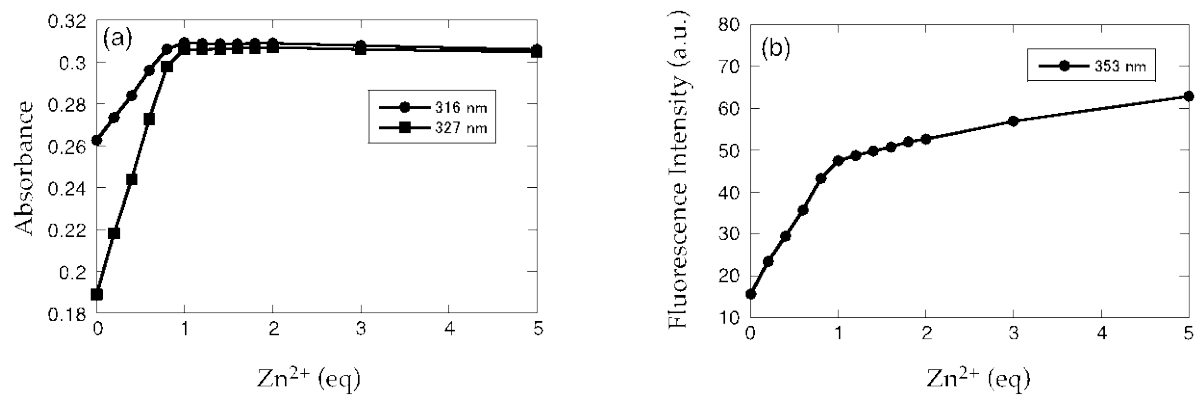

**Figure S2.** Zinc titration profile for 34  $\mu\text{M}$  1-isoTQTACN (**6**) in DMF/H<sub>2</sub>O (1:1) at 25 °C. (a) UV-vis absorbance changes at 316 and 327 nm. (b) Fluorescence intensity changes ( $\lambda_{\text{ex}} = 327$  nm) at 353 nm.

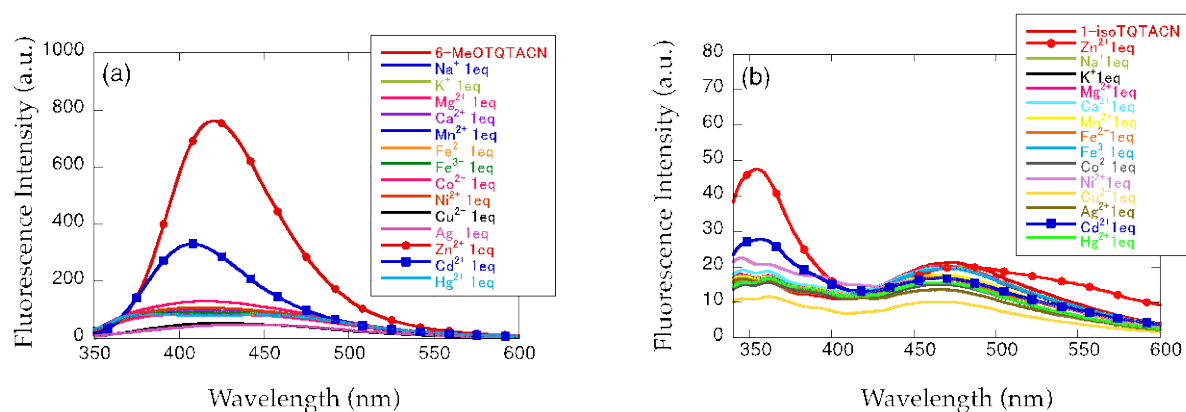

**Figure S3.** Comparison of fluorescence spectra of 34  $\mu$ M (a) 6-MeOTQTACN (**5**) ( $\lambda_{\text{ex}} = 341$  nm) and (b) 1-isoTQTACN (**6**) ( $\lambda_{\text{ex}} = 327$  nm) in DMF/H<sub>2</sub>O (1:1) at 25 °C in the presence of 1 equivalent of zinc (red, circles), cadmium (blue, squares) and other metal ions (various colors, no marks).

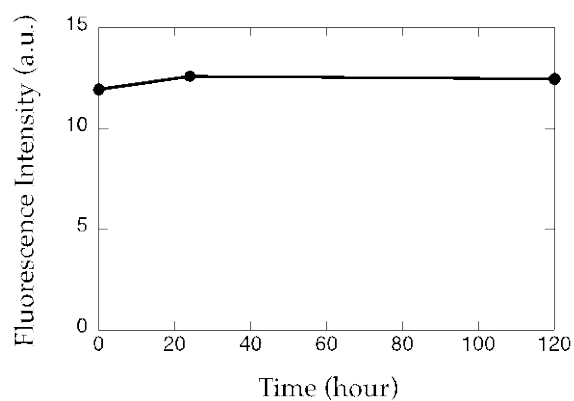

**Figure S4.** Fluorescence intensity change of 34  $\mu\text{M}$  TQTACN-Zn complex (**4-Zn**) at 388 nm ( $\lambda_{\text{ex}} = 317$  nm) in the presence of one equivalent of TPEN in DMF/H<sub>2</sub>O (1:1) at 25 °C.

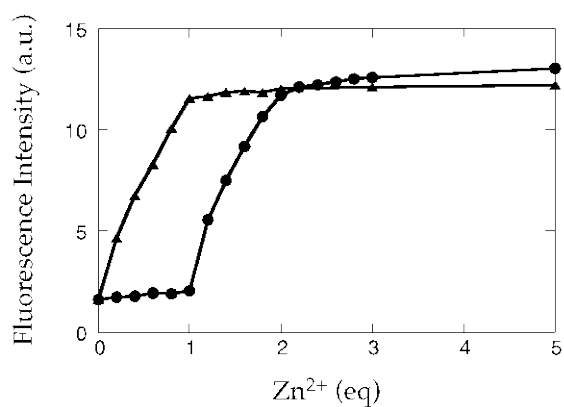

**Figure S5.** Competitive fluorescence intensity change of 34  $\mu\text{M}$  TQTACN (**4**) at 388 nm ( $\lambda_{\text{ex}} = 317$  nm) in the presence (circle) and absence (triangles) of one equivalent of TPEN with increasing amount of zinc in DMF/ $\text{H}_2\text{O}$  (1:1) at 25  $^\circ\text{C}$ .

S13

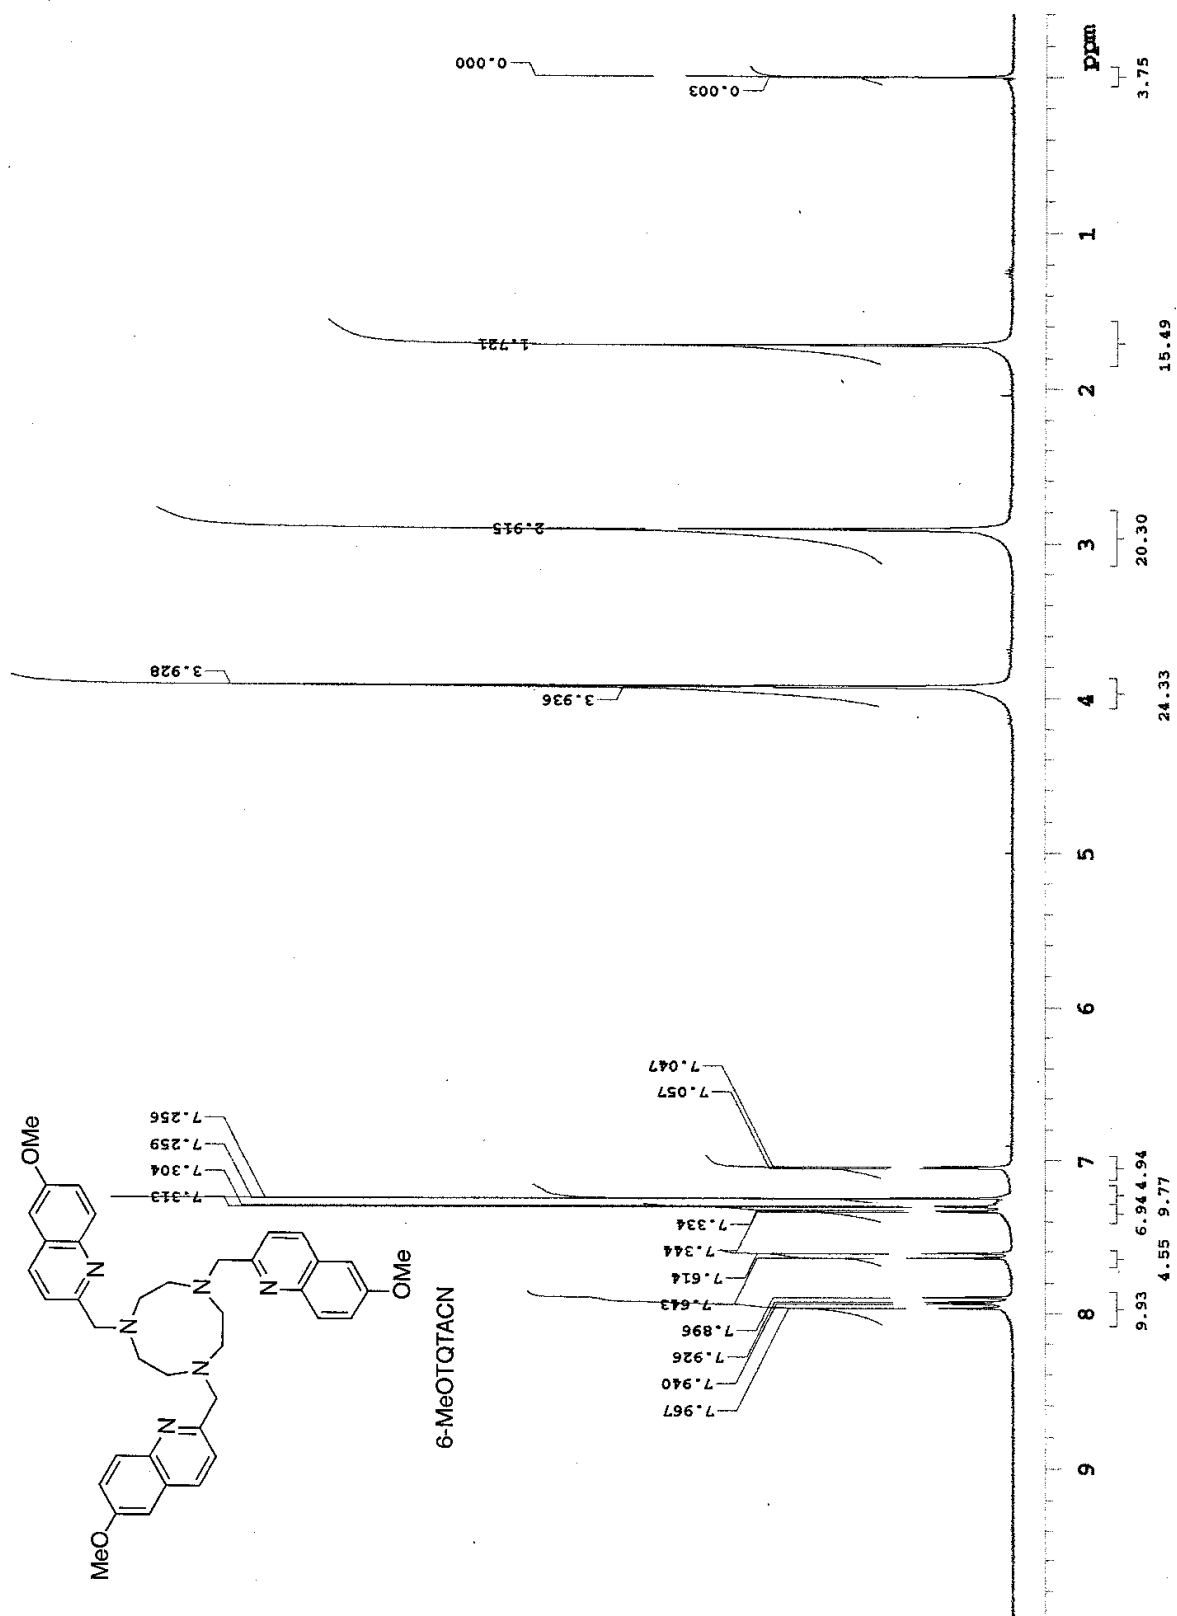

Figure S6. <sup>1</sup>H NMR spectrum of 6-MeOTQTACN (5) in CDCl<sub>3</sub>.

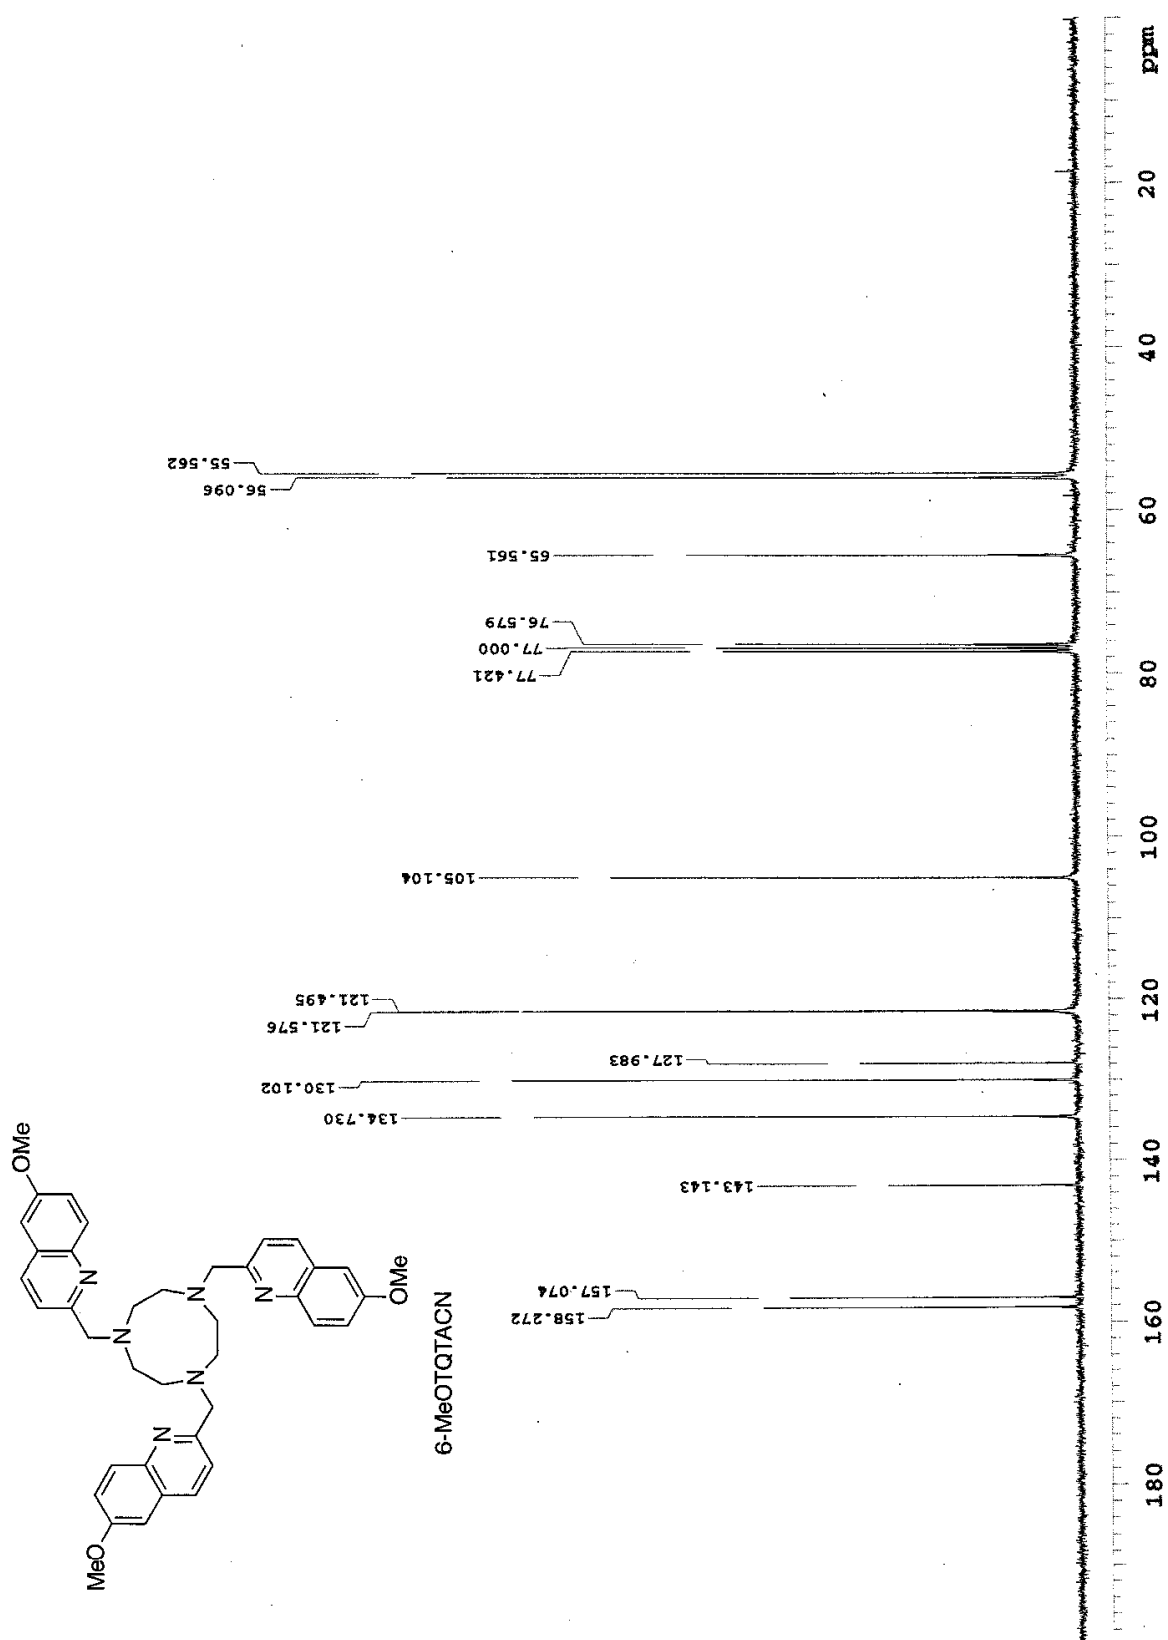

Figure S7. <sup>13</sup>C NMR spectrum of 6-MeOTQTACN (5) in CDCl<sub>3</sub>.

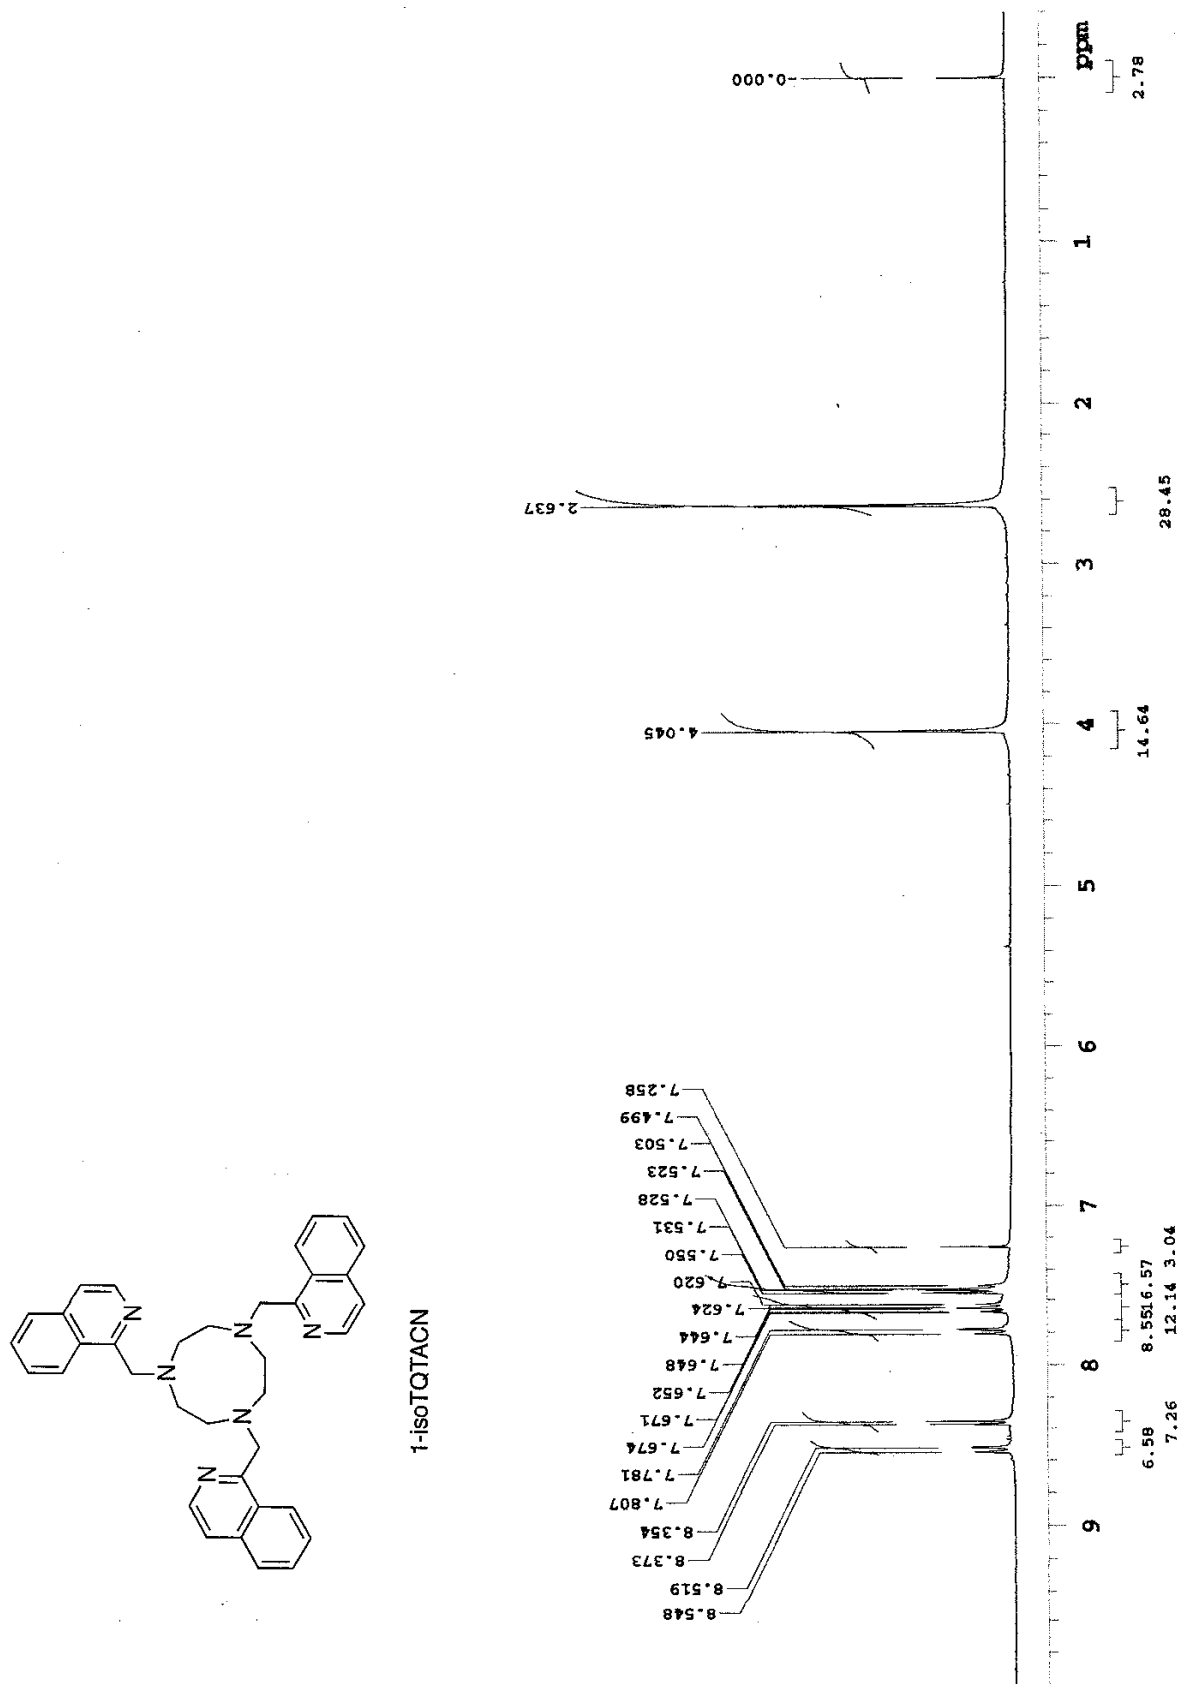

Figure S8. <sup>1</sup>H NMR spectrum of 1-isoTQTACN (6) in CDCl<sub>3</sub>.

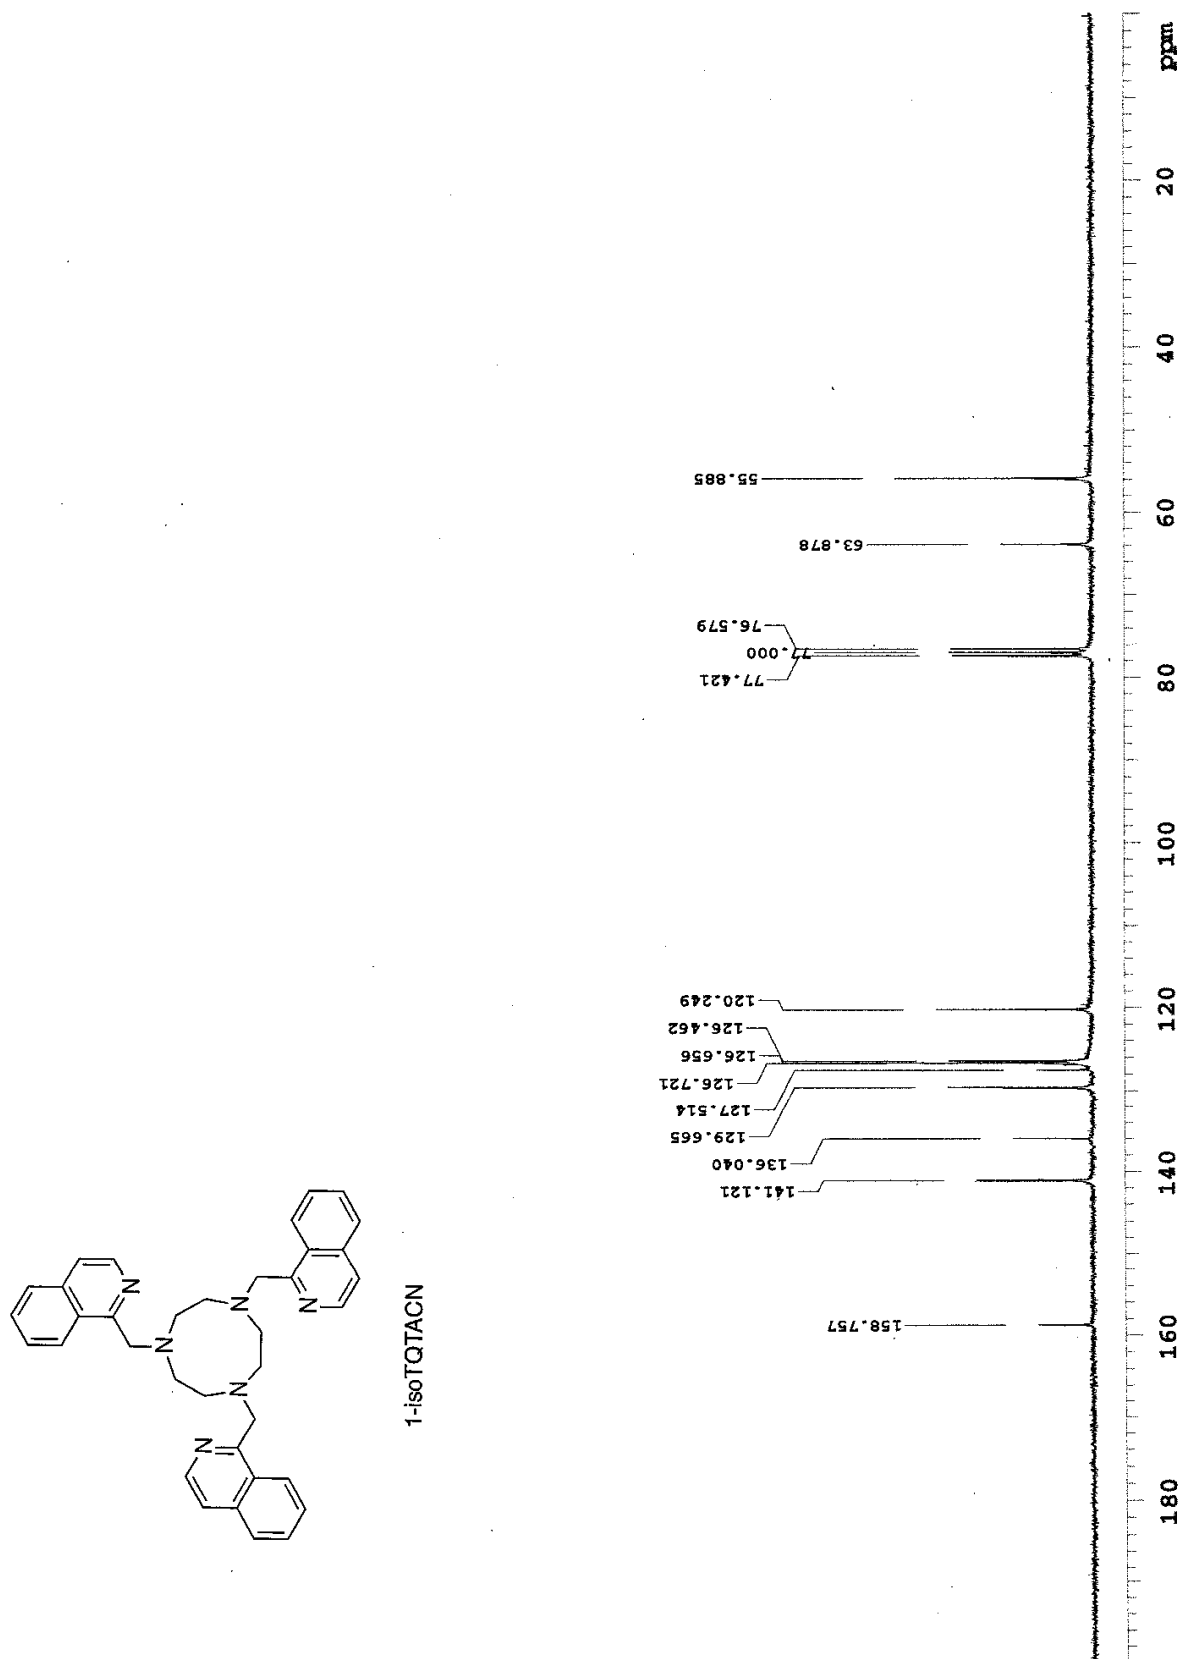

Figure S9.  $^{13}\text{C}$  NMR spectrum of 1-isoTQTACN (6) in  $\text{CDCl}_3$ .





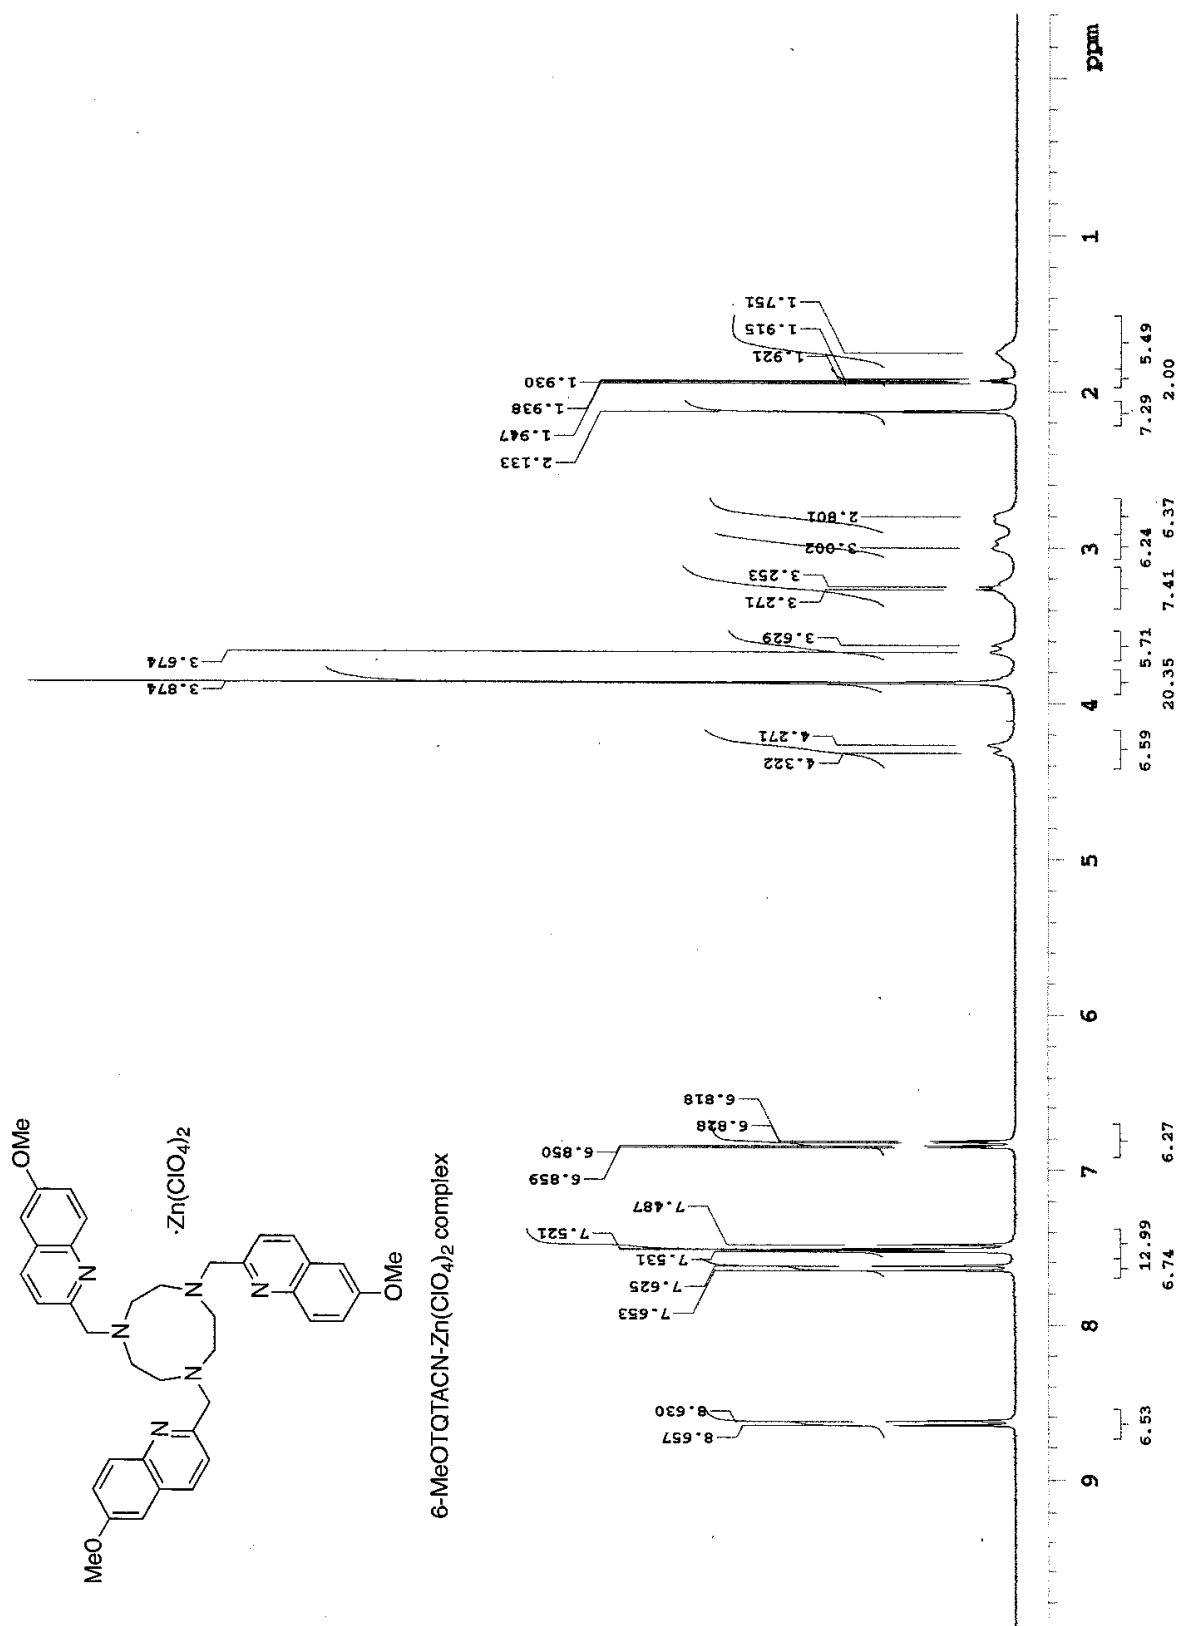

Figure S10. <sup>1</sup>H NMR spectrum of [Zn(6-MeOTQTACN)](ClO<sub>4</sub>)<sub>2</sub> (5-Zn) in CD<sub>3</sub>CN.

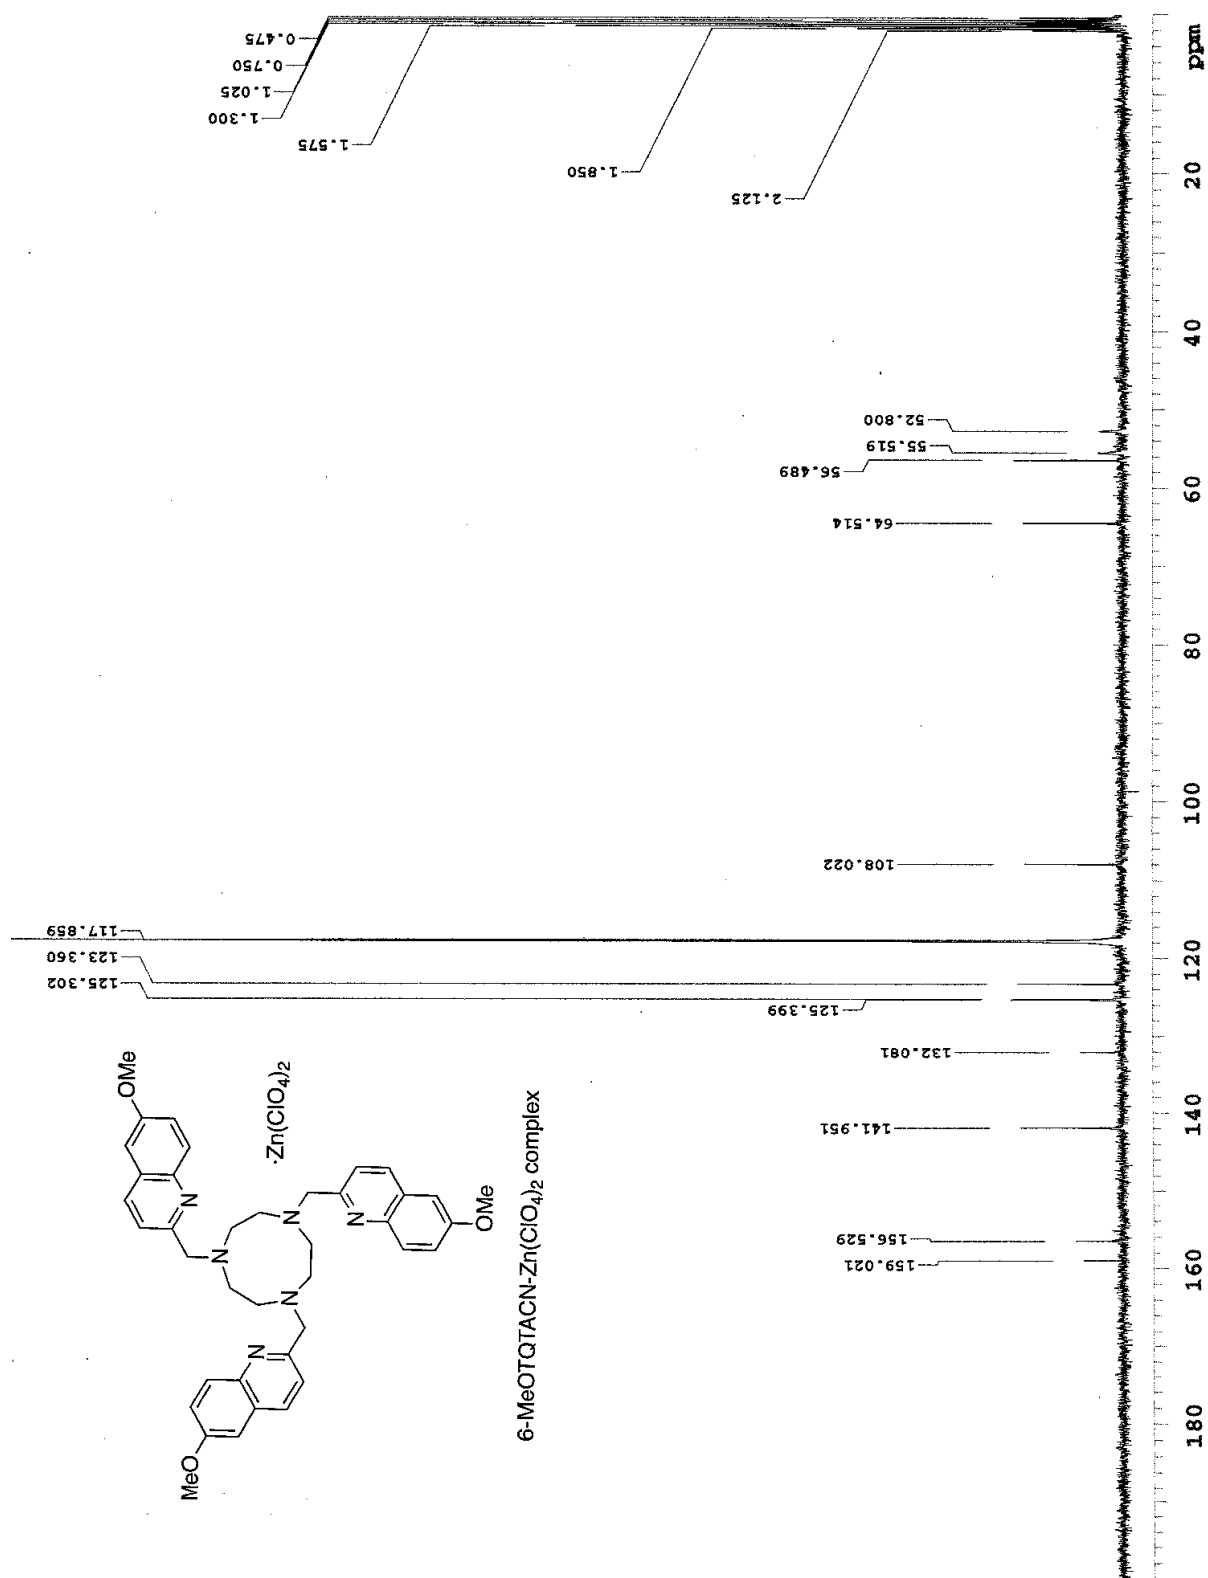

Figure S11. <sup>13</sup>C NMR spectrum of [Zn(6-MeOTQTACN)](ClO<sub>4</sub>)<sub>2</sub> (5-Zn) in CD<sub>3</sub>CN.

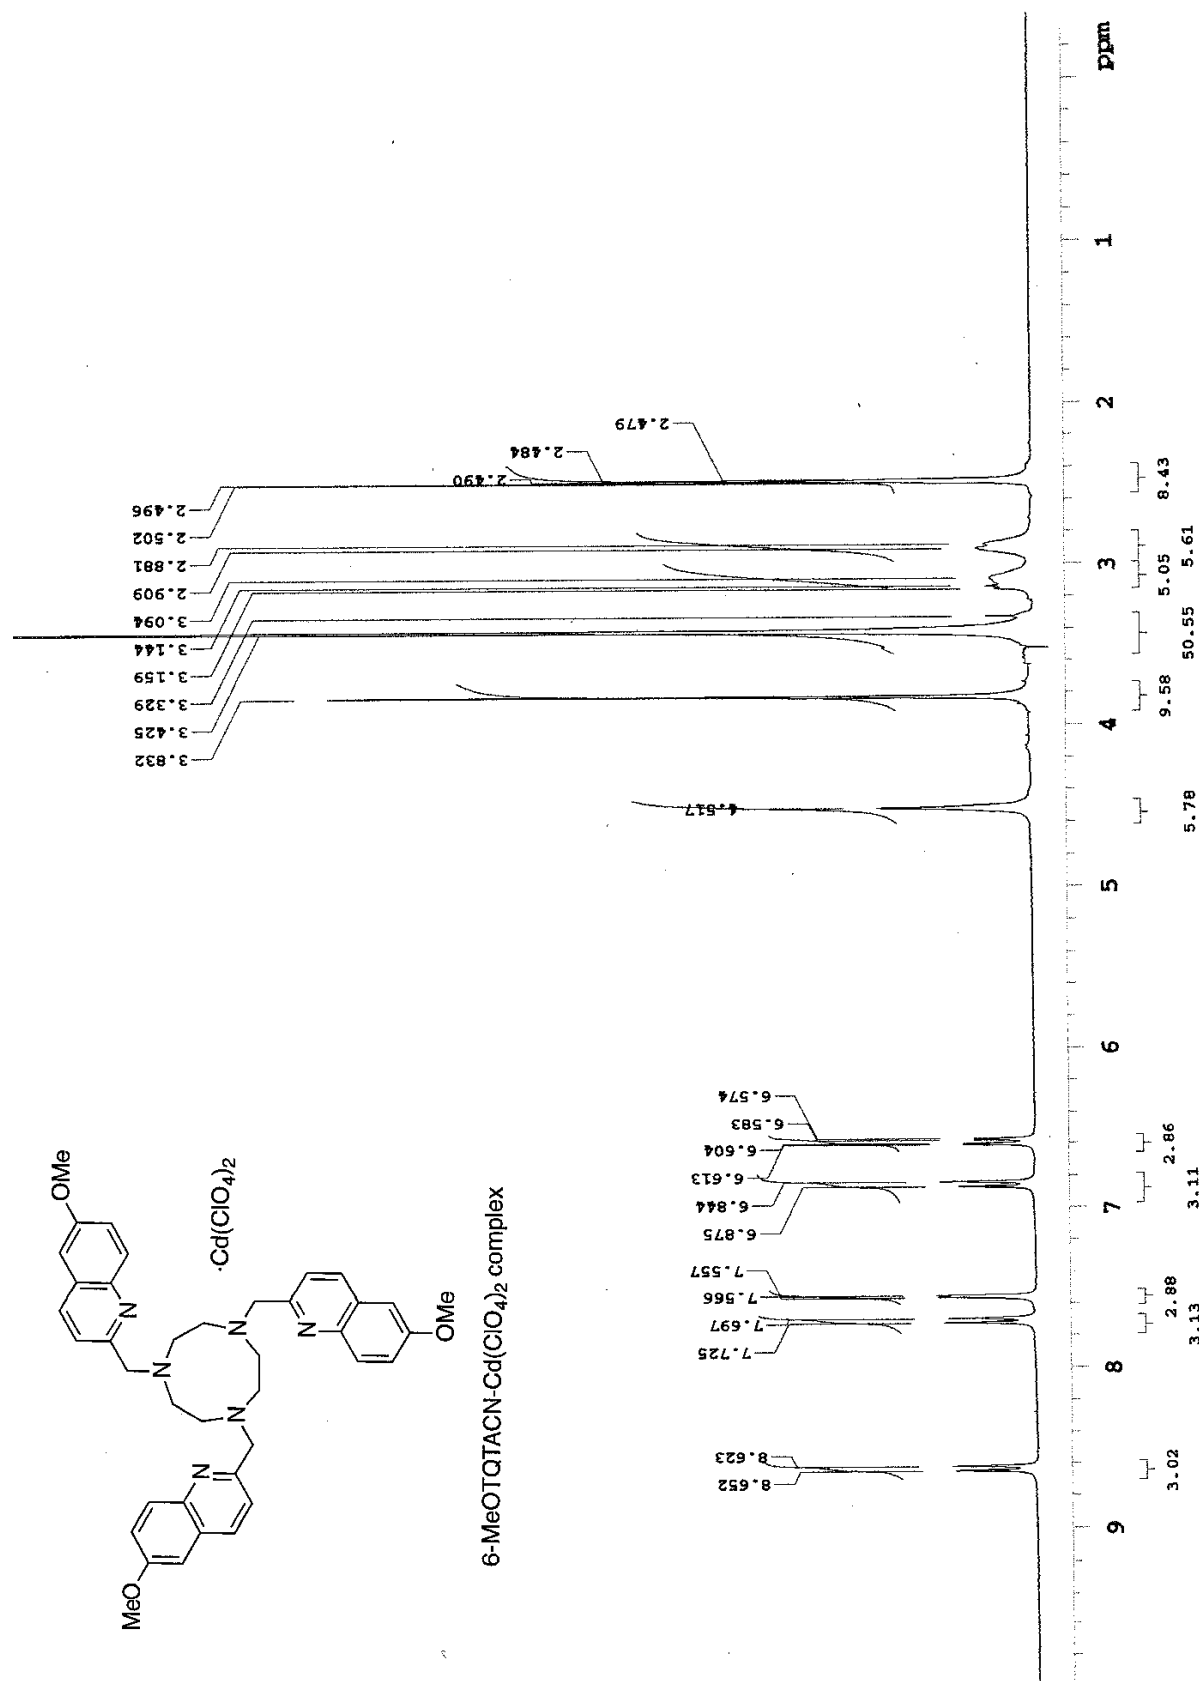

Figure S12. <sup>1</sup>H NMR spectrum of [Cd(6-MeOTQTACN)](ClO<sub>4</sub>)<sub>2</sub> (5-Cd) in DMSO-d<sub>6</sub>.

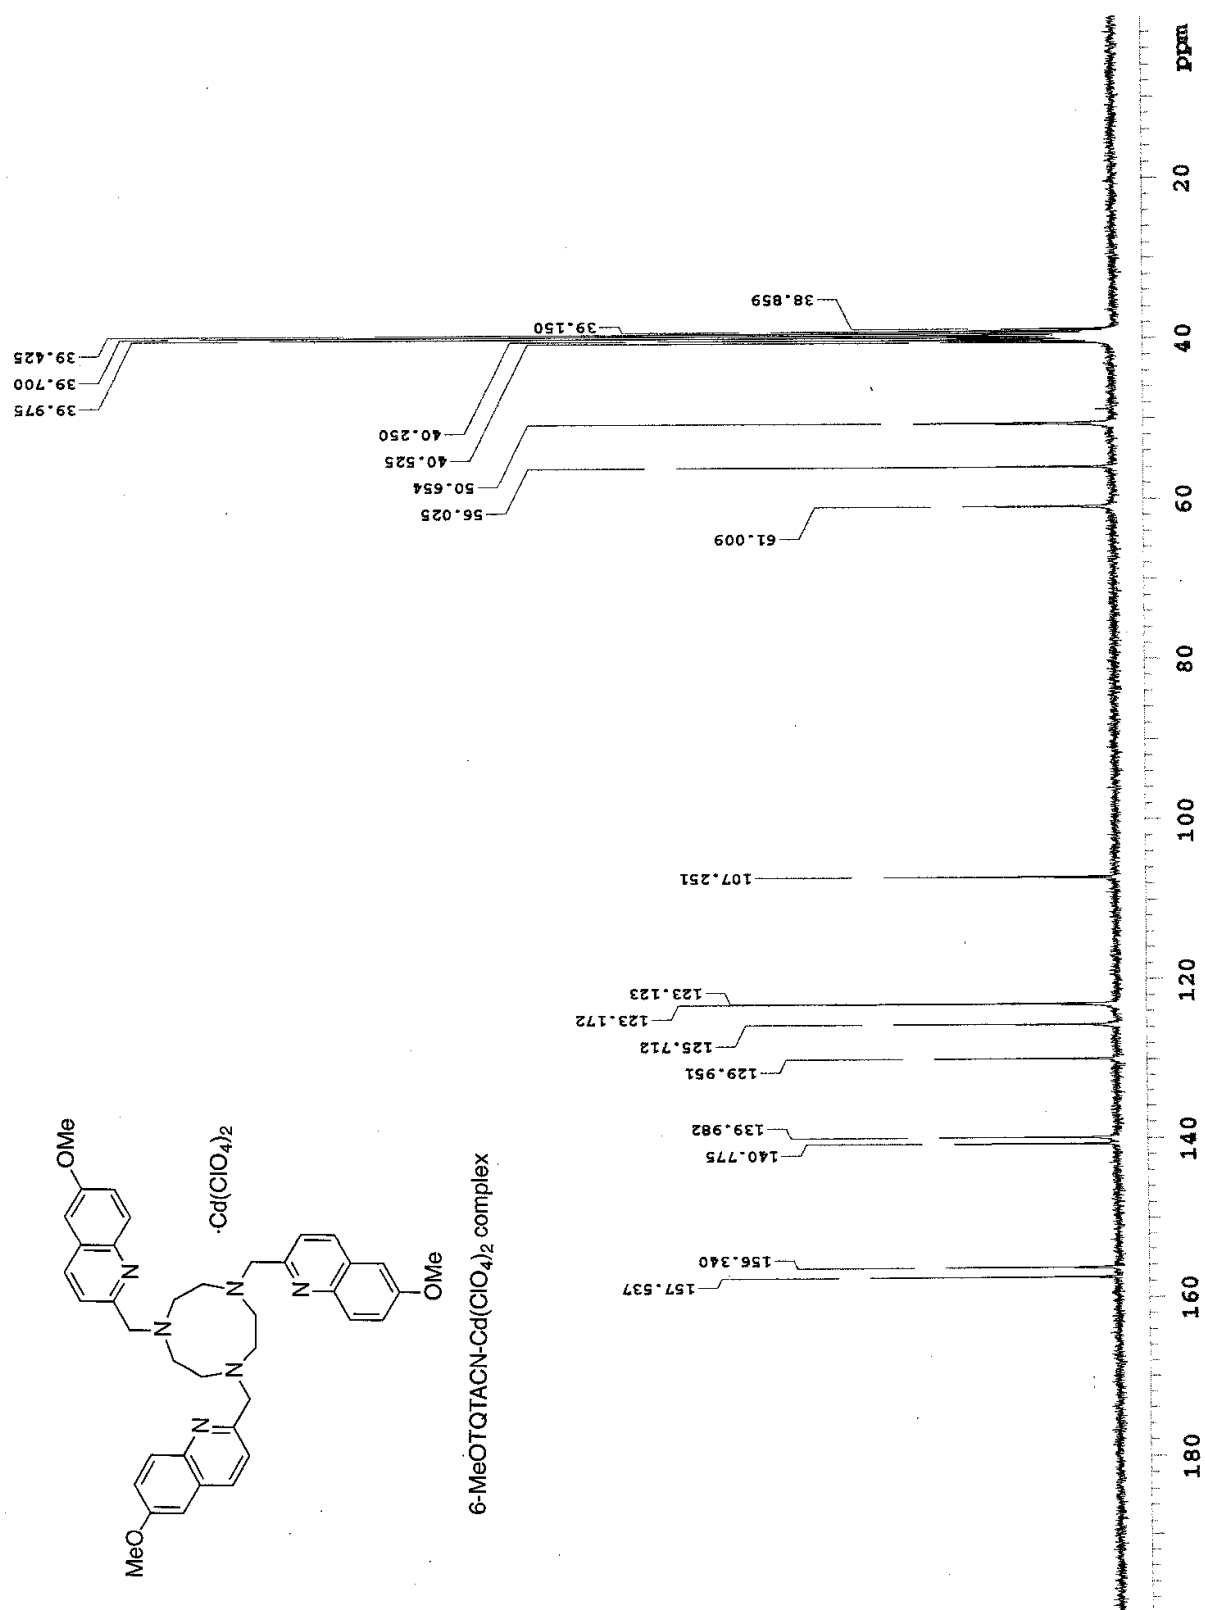

Figure S13.  $^{13}\text{C}$  NMR spectrum of  $[\text{Cd}(6\text{-MeOTQTACN})](\text{ClO}_4)_2$  (5-Cd) in  $\text{DMSO-}d_6$ .

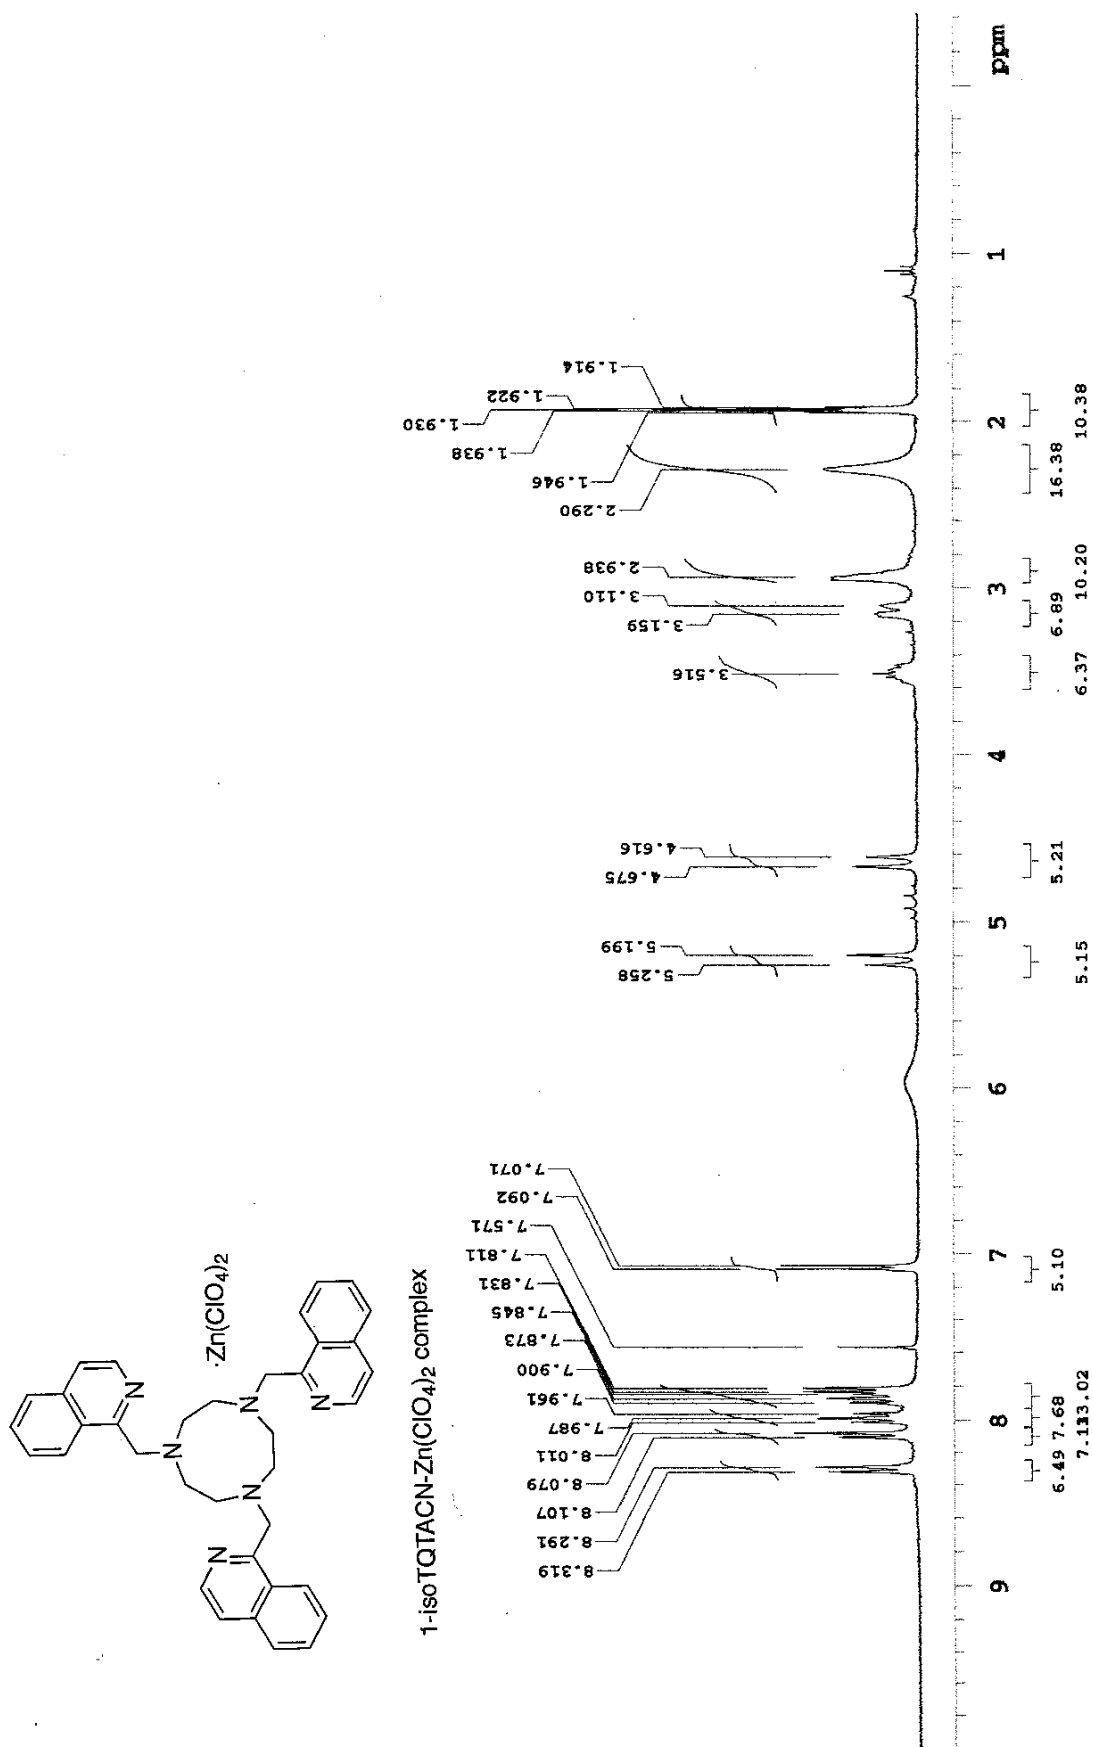

Figure S14.  $^1H$  NMR spectrum of  $[Zn(1-isoTQTACN)](ClO_4)_2$  (**6-Zn**) in  $CD_3CN$ .

S23

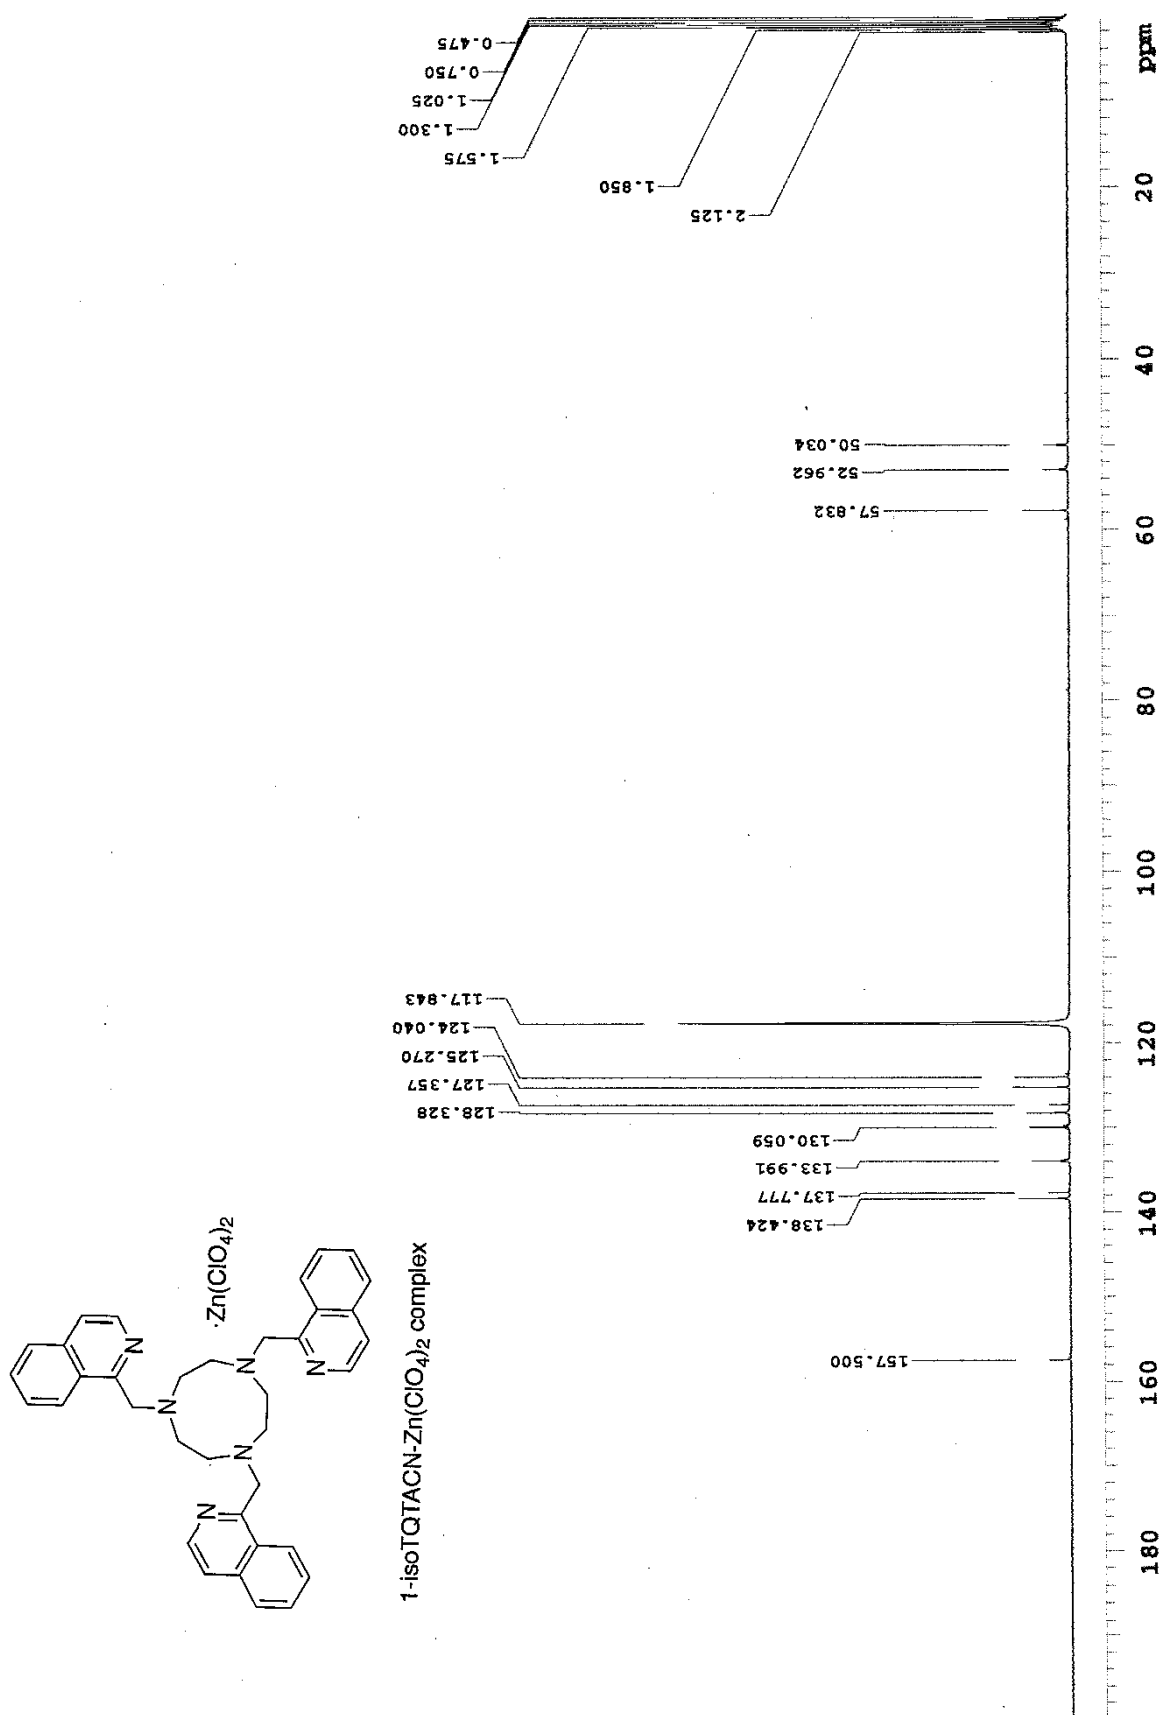

Figure S15. <sup>13</sup>C NMR spectrum of [Zn(1-isoTQTACN)](ClO<sub>4</sub>)<sub>2</sub> (6-Zn) in CD<sub>3</sub>CN.





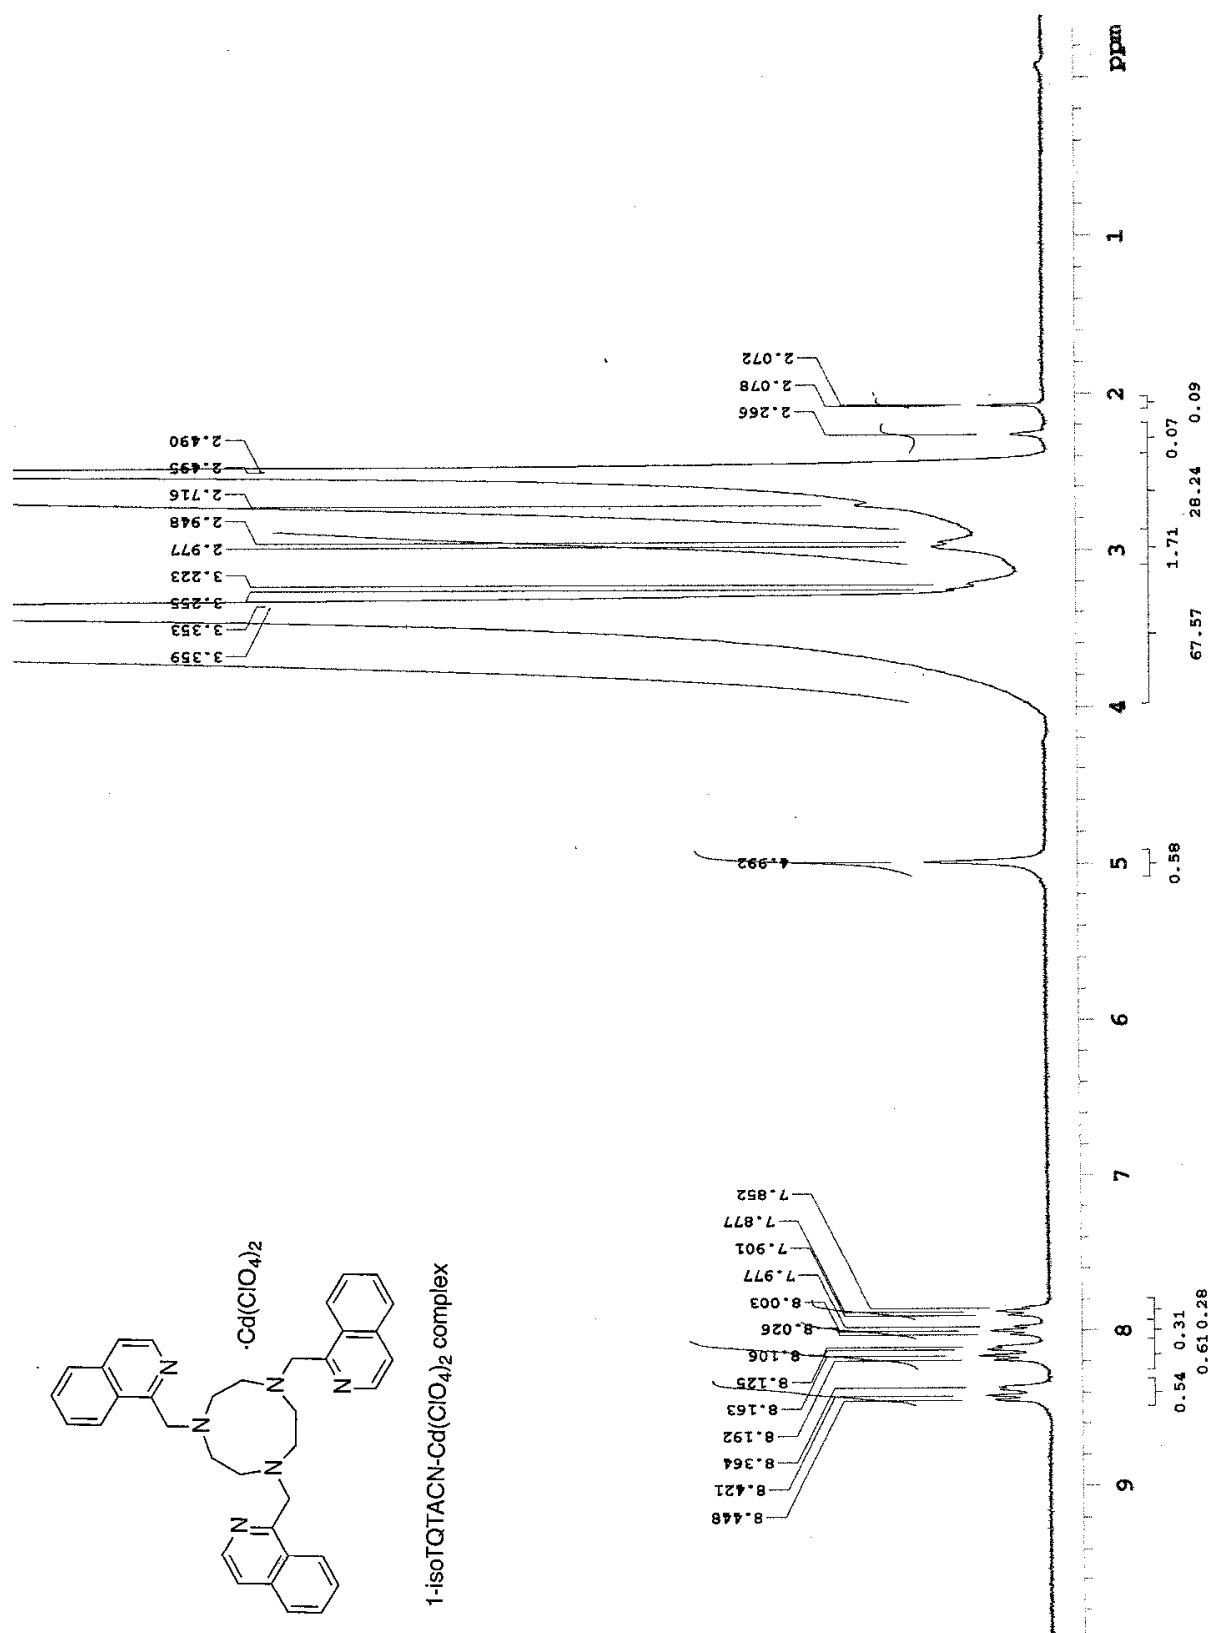

Figure S16.  $^1\text{H}$  NMR spectrum of  $[\text{Cd}(\text{1-isoTQTACN})](\text{ClO}_4)_2$  (6-Cd) in  $\text{DMSO-}d_6$ .

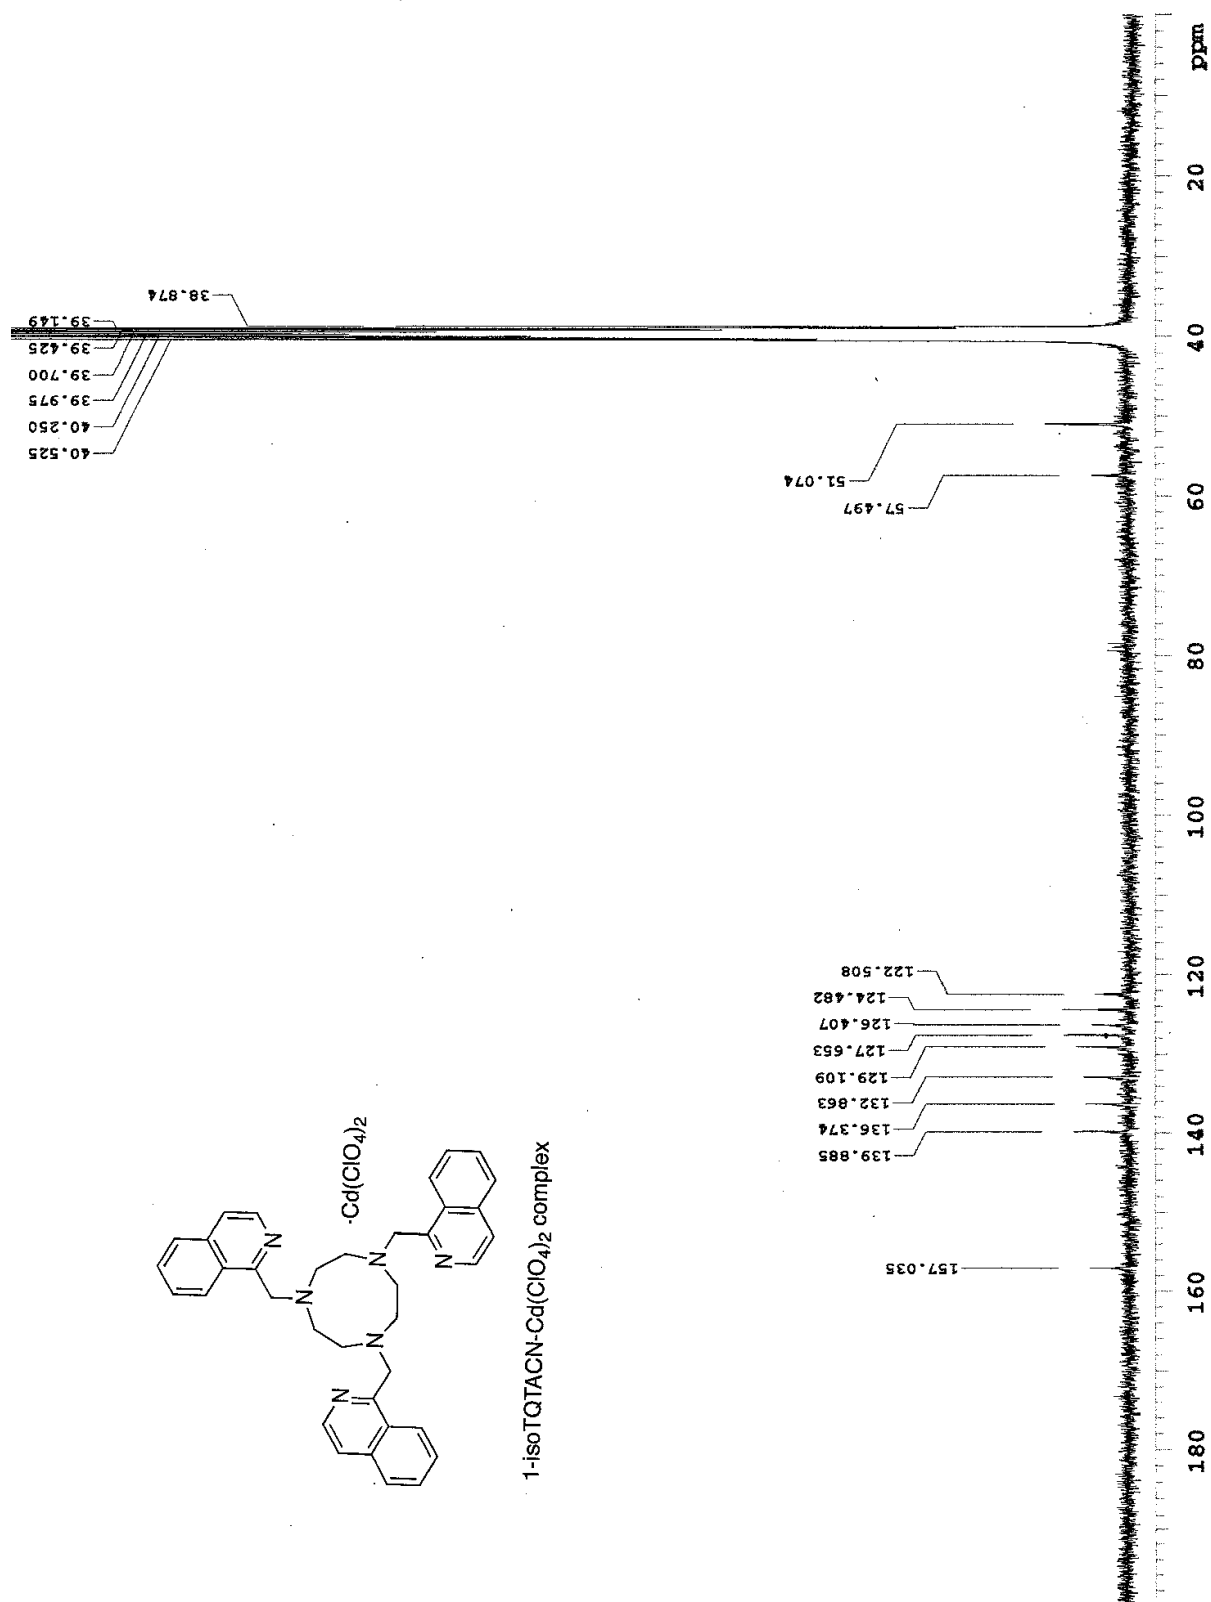

Figure S17. <sup>13</sup>C NMR spectrum of [Cd(1-isoTQTACN)](ClO<sub>4</sub>)<sub>2</sub> (6-Cd) in DMSO-*d*<sub>6</sub>.

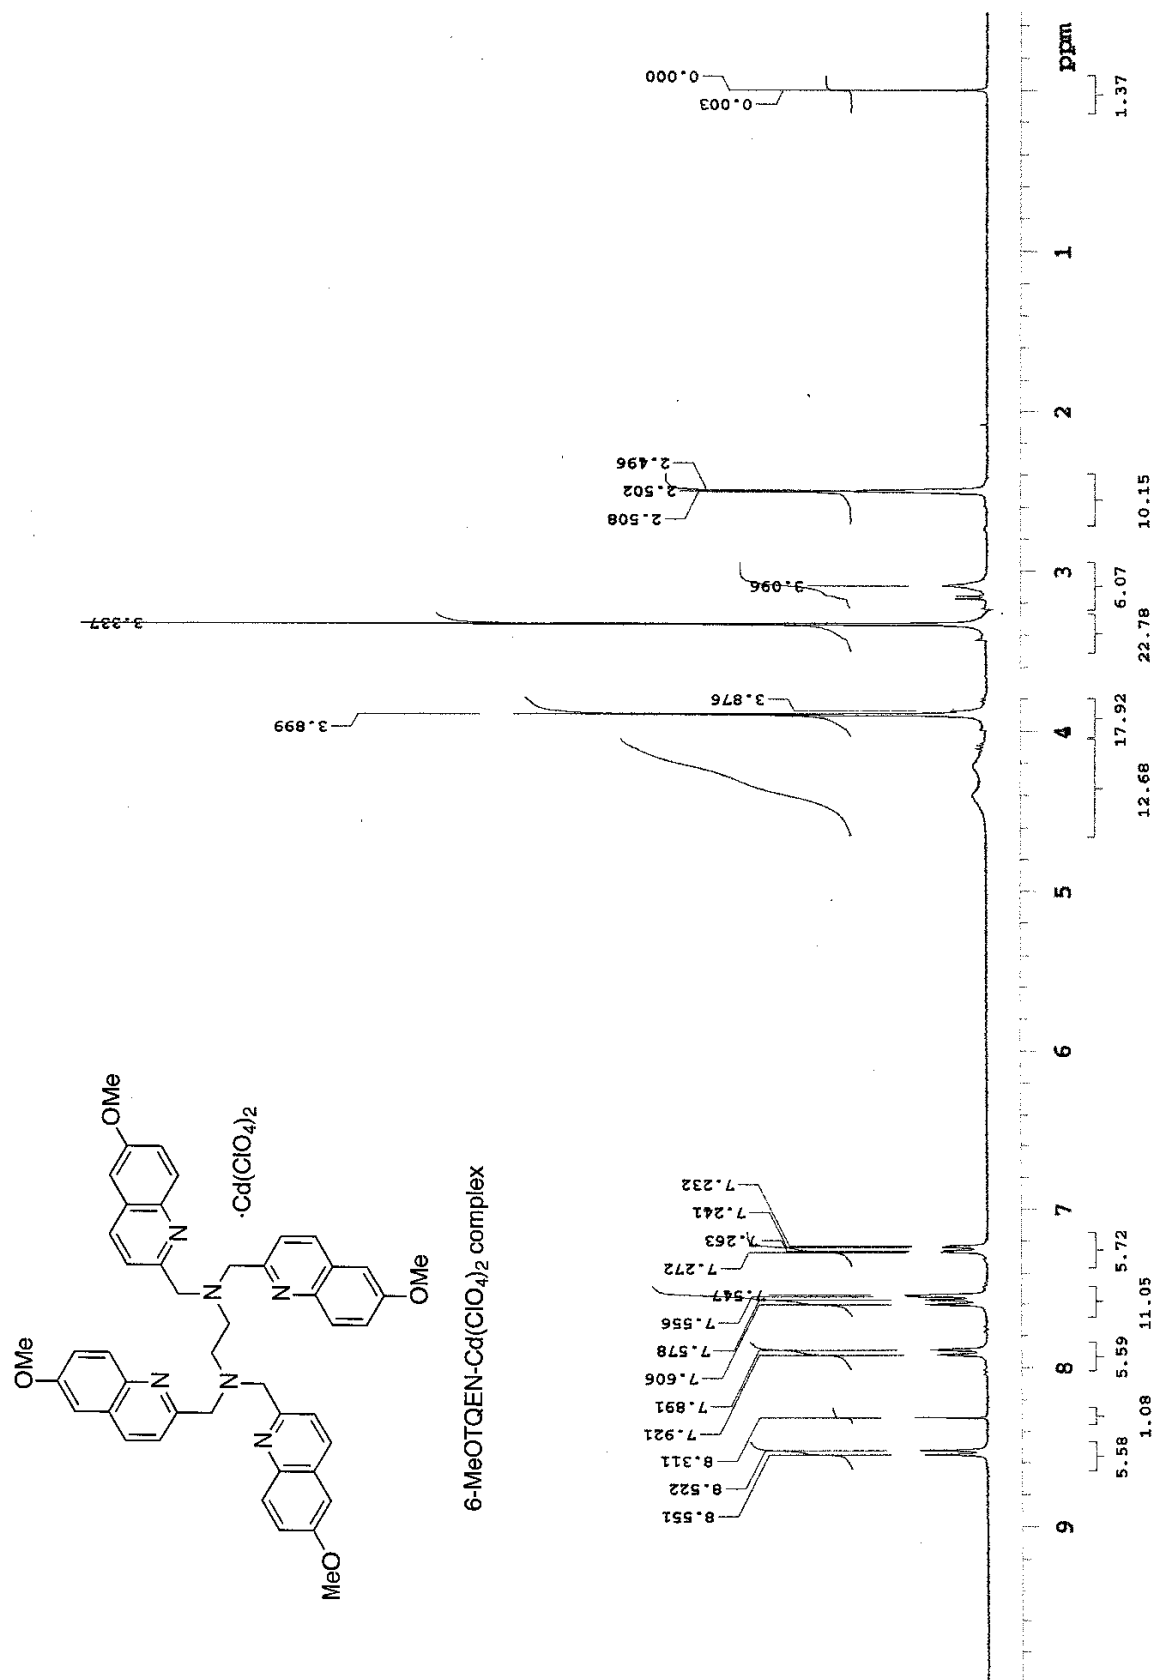

Figure S18. <sup>1</sup>H NMR spectrum of [Cd(6-MeOTQEN)](ClO<sub>4</sub>)<sub>2</sub> (2-Cd) in DMSO-*d*<sub>6</sub>.

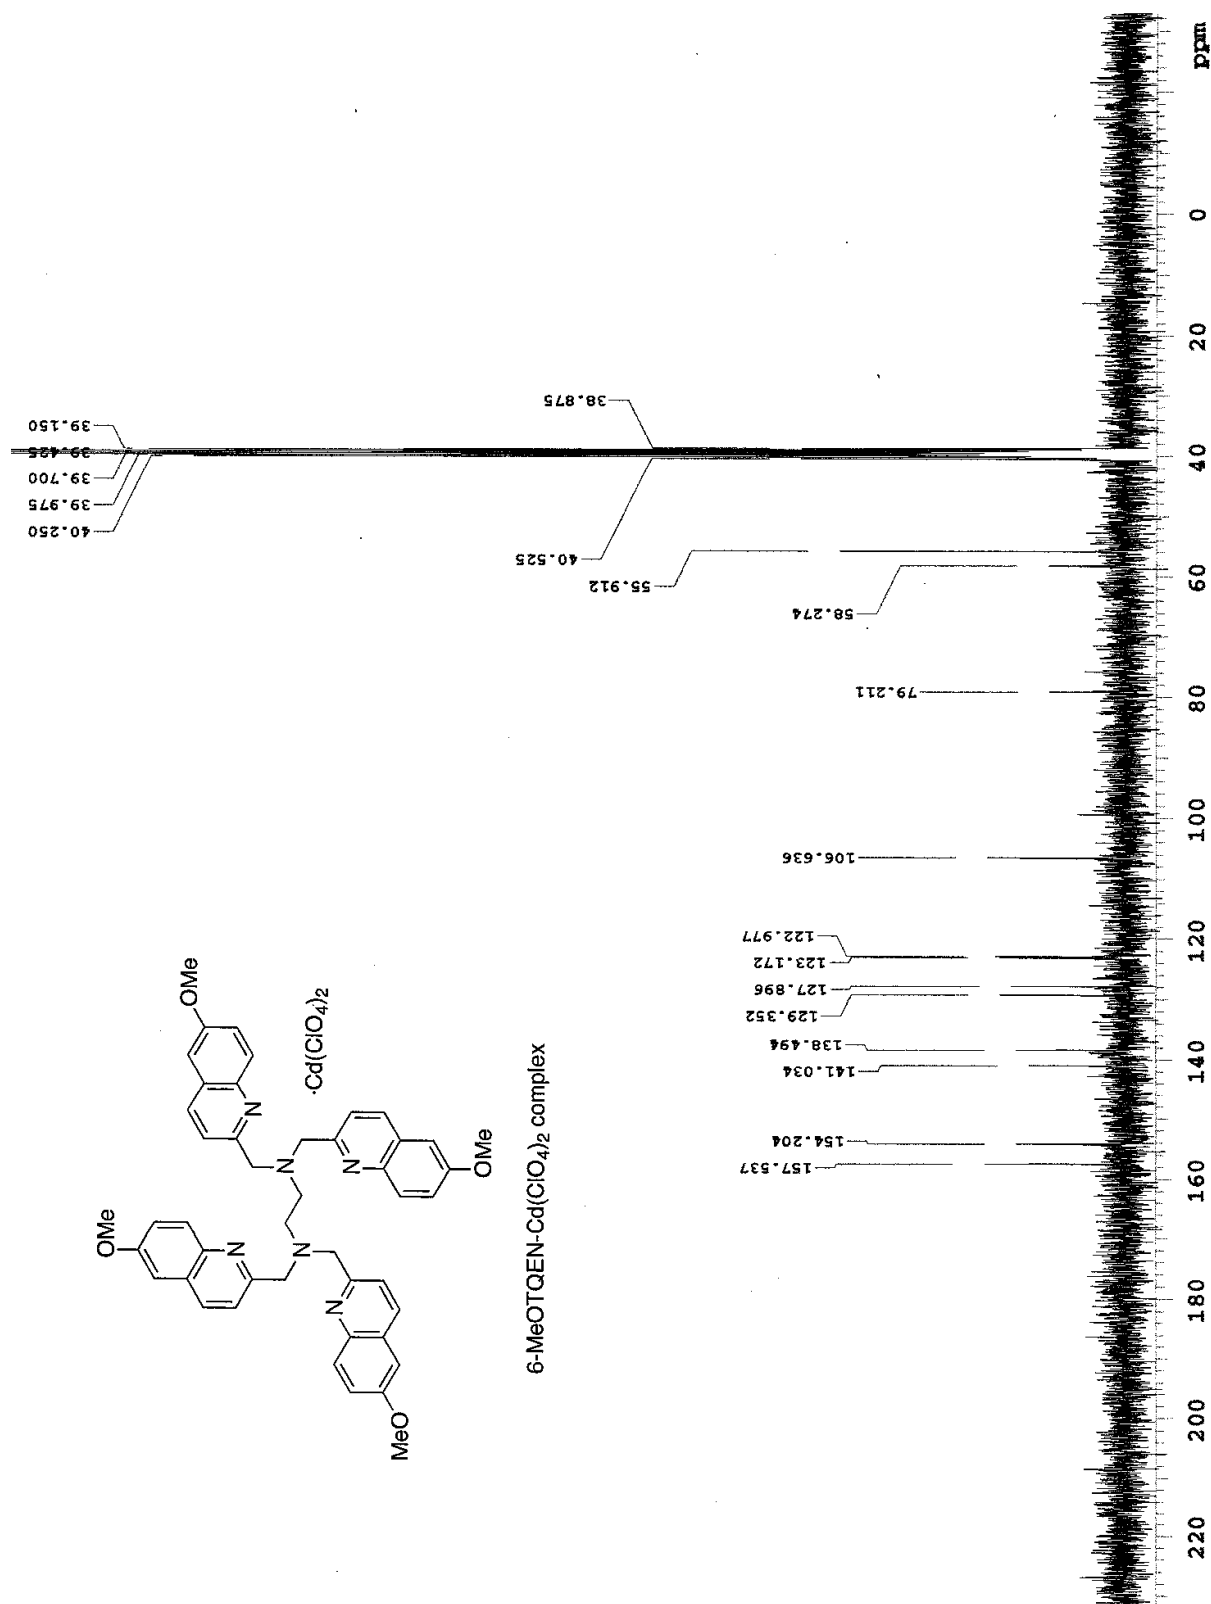

Figure S19. <sup>13</sup>C NMR spectrum of [Cd(6-MeOTQEN)](ClO<sub>4</sub>)<sub>2</sub> (2-Cd) in DMSO-*d*<sub>6</sub>.
